# Supplementary material
Source: ML conference proceedings conference paper supplement (https://openreview.net/forum?id=8XNKIR3CEn)
Supplement: supplementary_material [file synthetic_best_tau.pdf › dlgn_scalability/analysis/plots/synthetic_best_tau.pdf]

# of Classes

|      |     |     |   |   |    |    |    |    |     |     |
|------|-----|-----|---|---|----|----|----|----|-----|-----|
| 2000 | 0.1 | 1   | 1 | 1 | 1  | 10 | 10 | 10 | 10  | 10  |
| 928  | 0.1 | 1   | 1 | 1 | 10 | 10 | 10 | 10 | 10  | 10  |
| 430  | 0.1 | 1   | 1 | 1 | 10 | 10 | 10 | 10 | 10  | 10  |
| 199  | 1   | 1   | 1 | 1 | 1  | 10 | 10 | 10 | 10  | 10  |
| 92   | 1   | 1   | 1 | 1 | 1  | 10 | 10 | 10 | 10  | 10  |
| 43   | 0.1 | 1   | 1 | 1 | 1  | 10 | 10 | 10 | 10  | 10  |
| 19   | 1   | 1   | 1 | 1 | 1  | 10 | 10 | 10 | 100 | 100 |
| 9    | 0.1 | 1   | 1 | 1 | 1  | 10 | 10 | 10 | 10  | 10  |
| 4    | 0.1 | 0.1 | 1 | 1 | 1  | 10 | 10 | 10 | 10  | 10  |
| 2    | 1   | 1   | 1 | 1 | 1  | 1  | 10 | 10 | 10  | 10  |

2 4 9 19 43 92 199 430 928 2000

# Output Neurons per Class
