# Supplementary material
Source: ML conference proceedings conference paper supplement (https://openreview.net/forum?id=8XNKIR3CEn)
Supplement: supplementary_material [file synthetic_pattern_bw_annotated.pdf › dlgn_scalability/analysis/plots/synthetic_pattern_bw_annotated.pdf]

700

702

478

173

342

454

680

713

547

660661

579

327

76

105

637

778

582

695

724

754

586

307
