# Supplementary material
Source: ML conference proceedings conference paper supplement (https://openreview.net/forum?id=8XNKIR3CEn)
Supplement: supplementary_material [file synthetic_pattern_colored_annotated.pdf › dlgn_scalability/analysis/plots/synthetic_pattern_colored_annotated.pdf]

3

15

112

125

169

179

181

186

253

266

273

275

317

354

373

382

401

409

416

478

471472

547

577578

580

602

628

672

691

722

727

774

782
