# Supplementary material
Source: ML conference proceedings conference paper supplement (https://openreview.net/forum?id=8XNKIR3CEn)
Supplement: supplementary_material [file synthetic_tau_dropout.pdf › dlgn_scalability/analysis/plots/synthetic_tau_dropout.pdf]

Dropout

0 %

2.1 %

5.8 %

33.8 %

21.9 %

14.6 %

6.9 %

10 %

5.2 %

41.0 %

38.1 %

23.6 %

15.2 %

6.7 %

30 %

2.5 %

27.8 %

40.2 %

24.6 %

15.0 %

6.0 %

50 %

1.7 %

19.6 %

37.5 %

23.4 %

14.1 %

4.7 %

70 %

1.1 %

11.7 %

26.8 %

16.6 %

9.6 %

3.9 %

90 %

0.5 %

3.8 %

7.4 %

5.5 %

2.8 %

1.3 %

0.10

0.40

1.58

6.31

25.12

100.00

$\tau$
