# Supplementary material
Source: ML conference proceedings conference paper supplement (https://openreview.net/forum?id=8XNKIR3CEn)

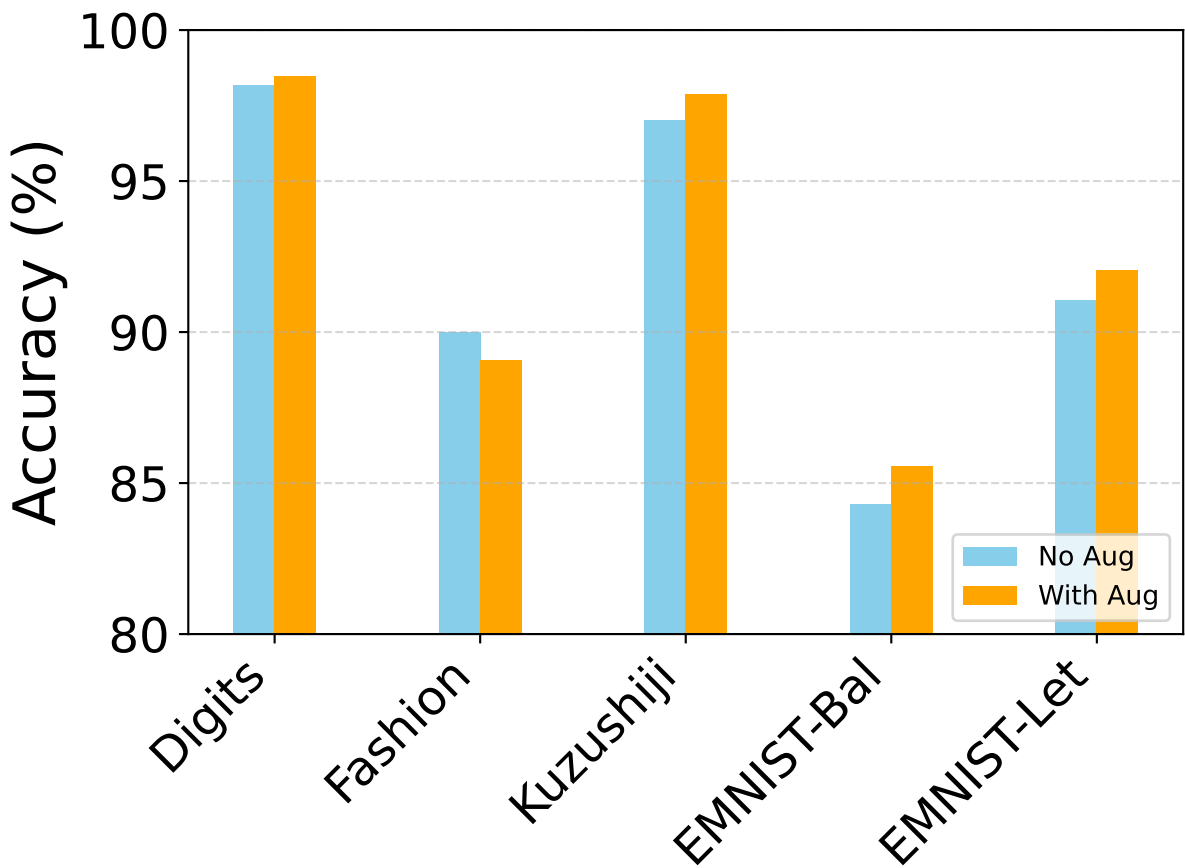

Supplement: supplementary_material [file augmentation.pdf › dlgn_scalability/analysis/plots/augmentation.pdf]

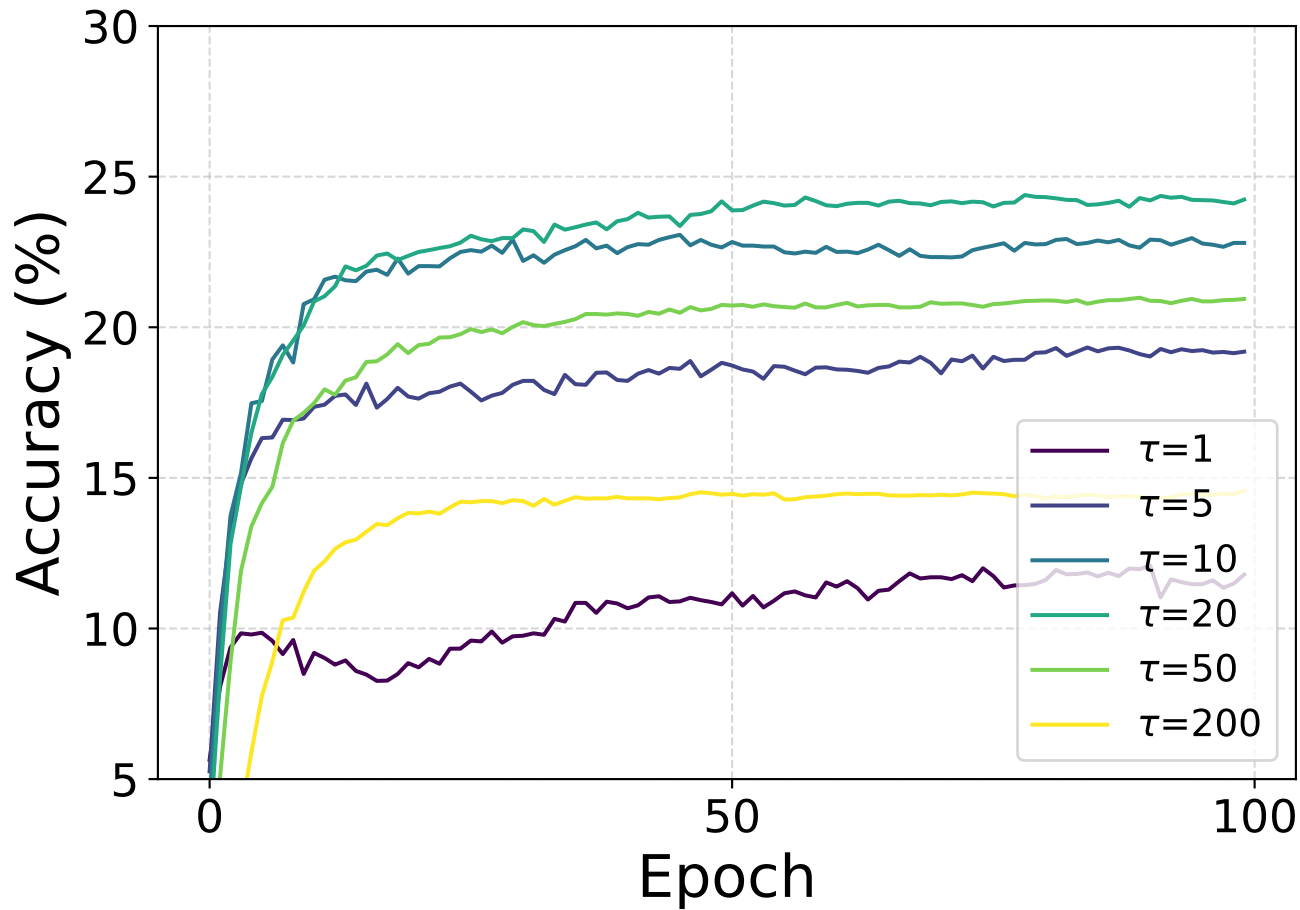

Supplement: supplementary_material [file cifar100_different_tau.pdf › dlgn_scalability/analysis/plots/cifar100_different_tau.pdf]

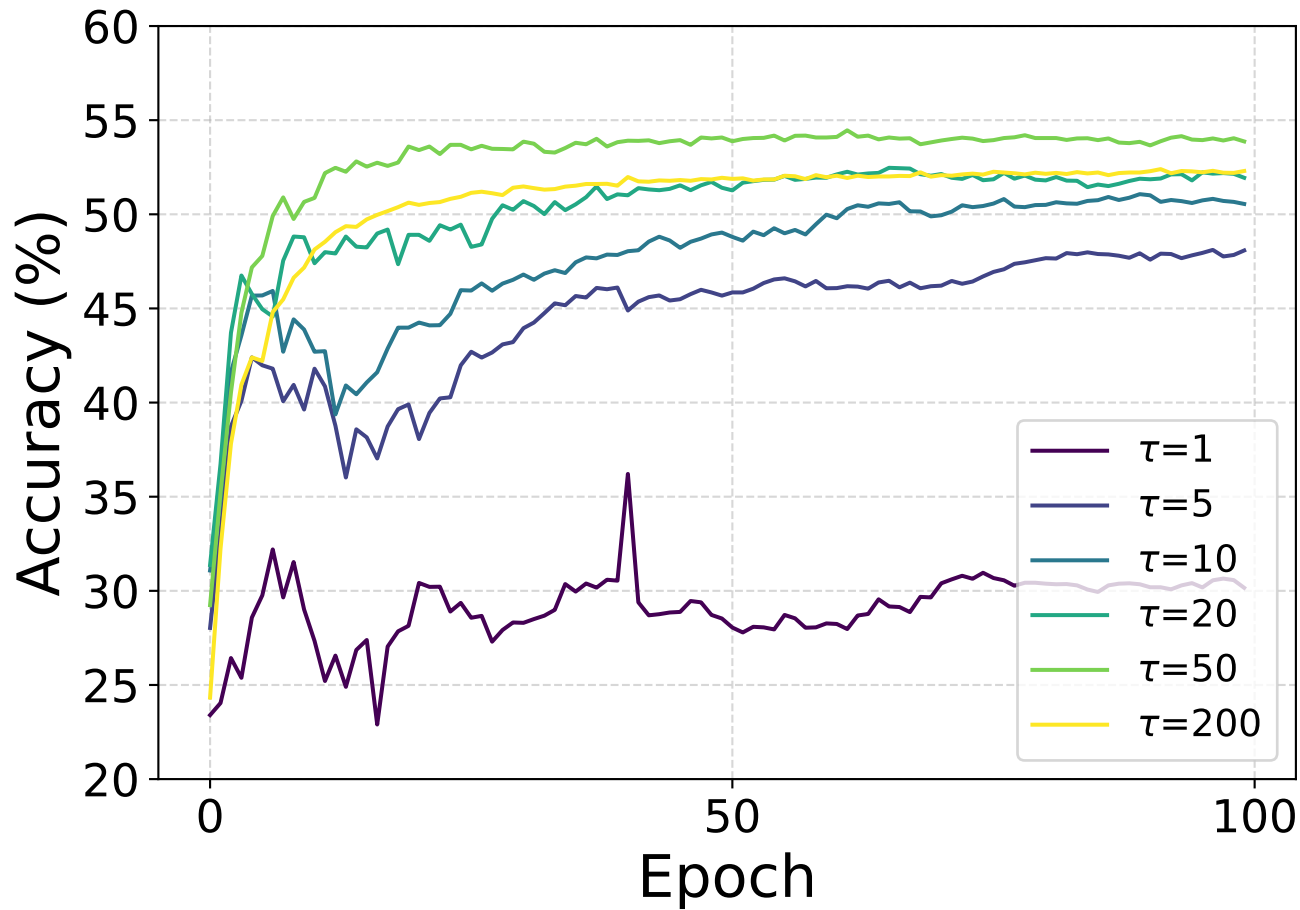

Supplement: supplementary_material [file cifar10_different_tau.pdf › dlgn_scalability/analysis/plots/cifar10_different_tau.pdf]

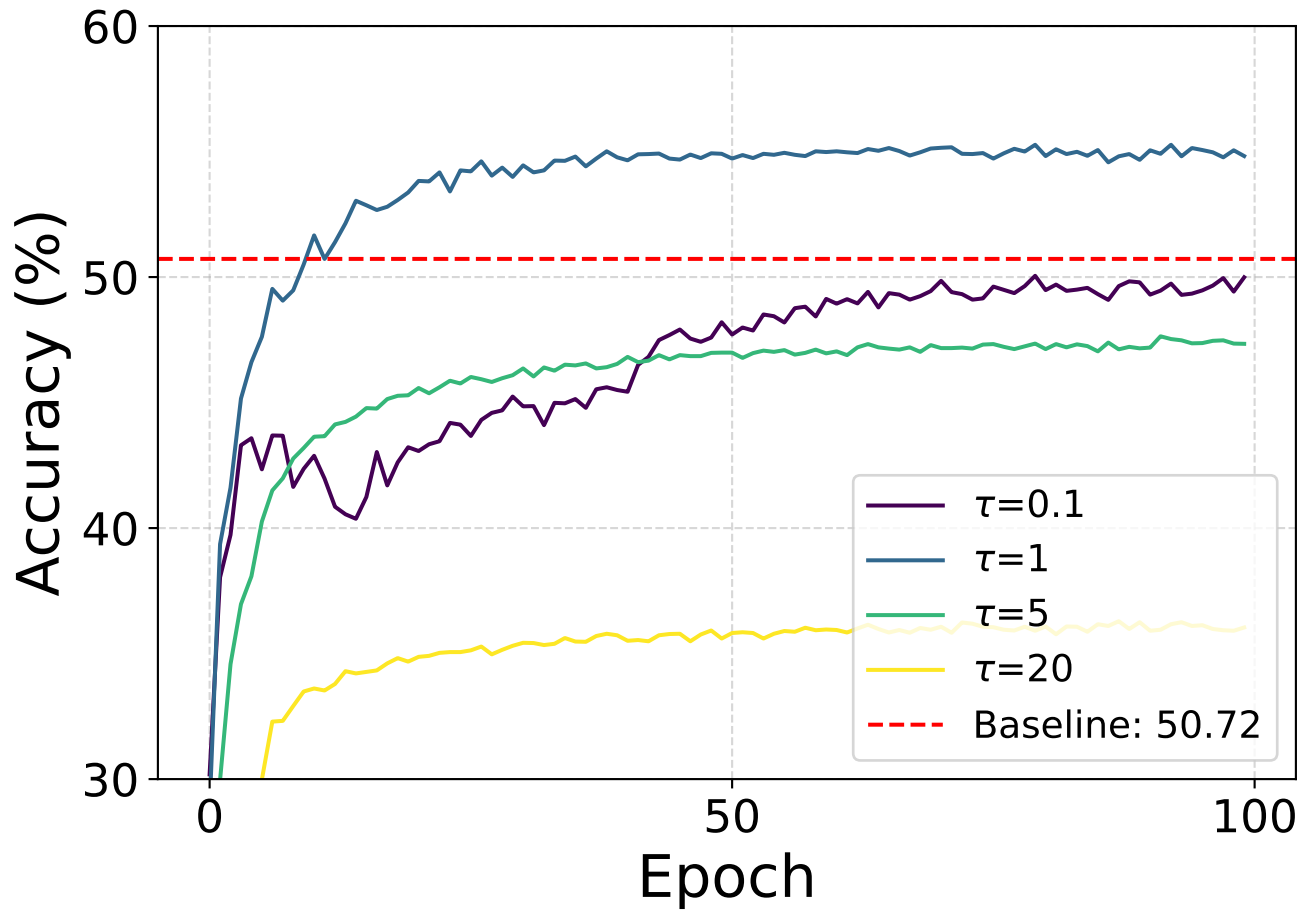

Supplement: supplementary_material [file cifar10_distance.pdf › dlgn_scalability/analysis/plots/cifar10_distance.pdf]

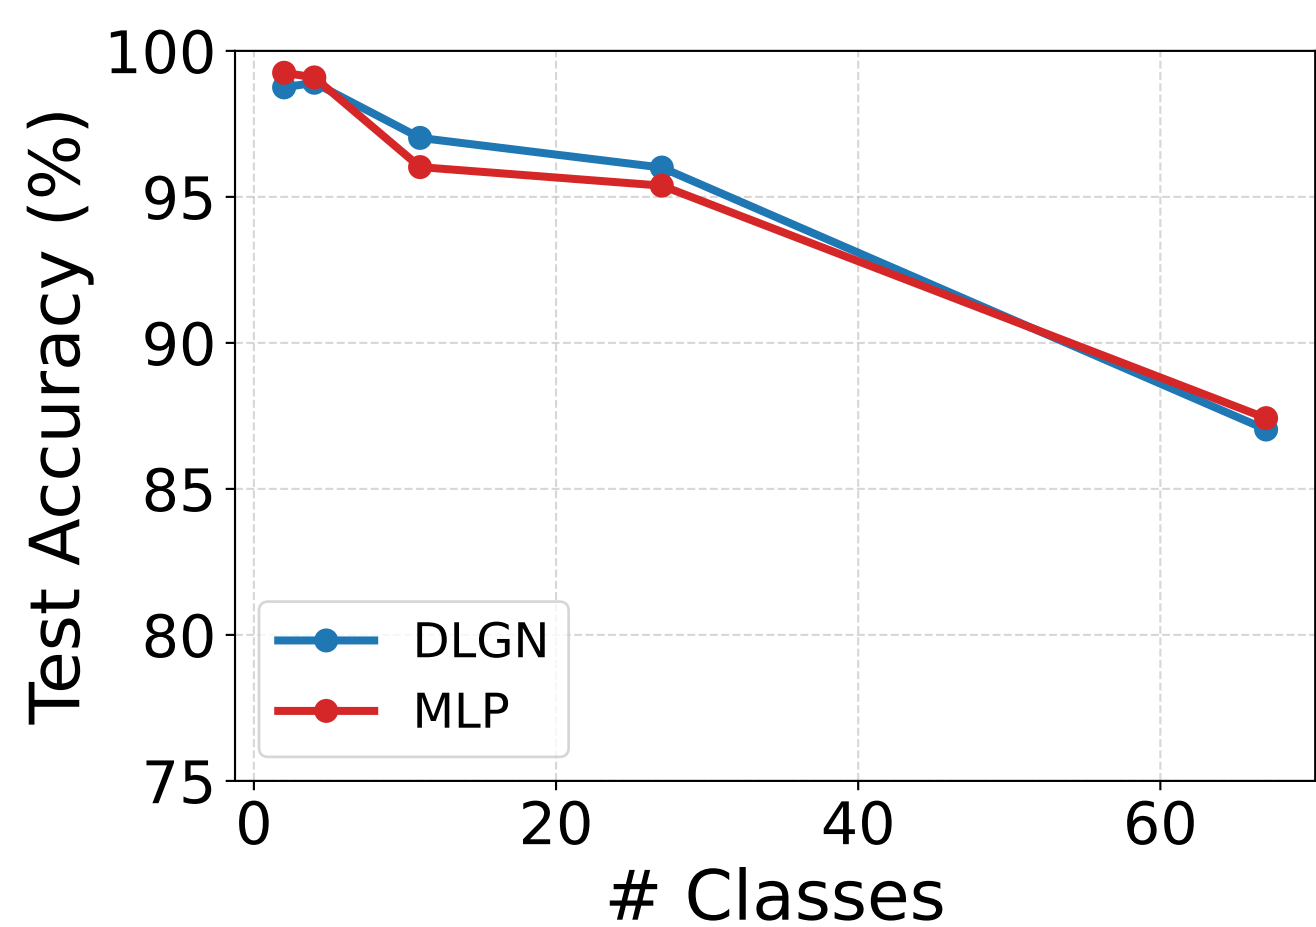

Supplement: supplementary_material [file combined_mnist_num_classes.pdf › dlgn_scalability/analysis/plots/combined_mnist_num_classes.pdf]

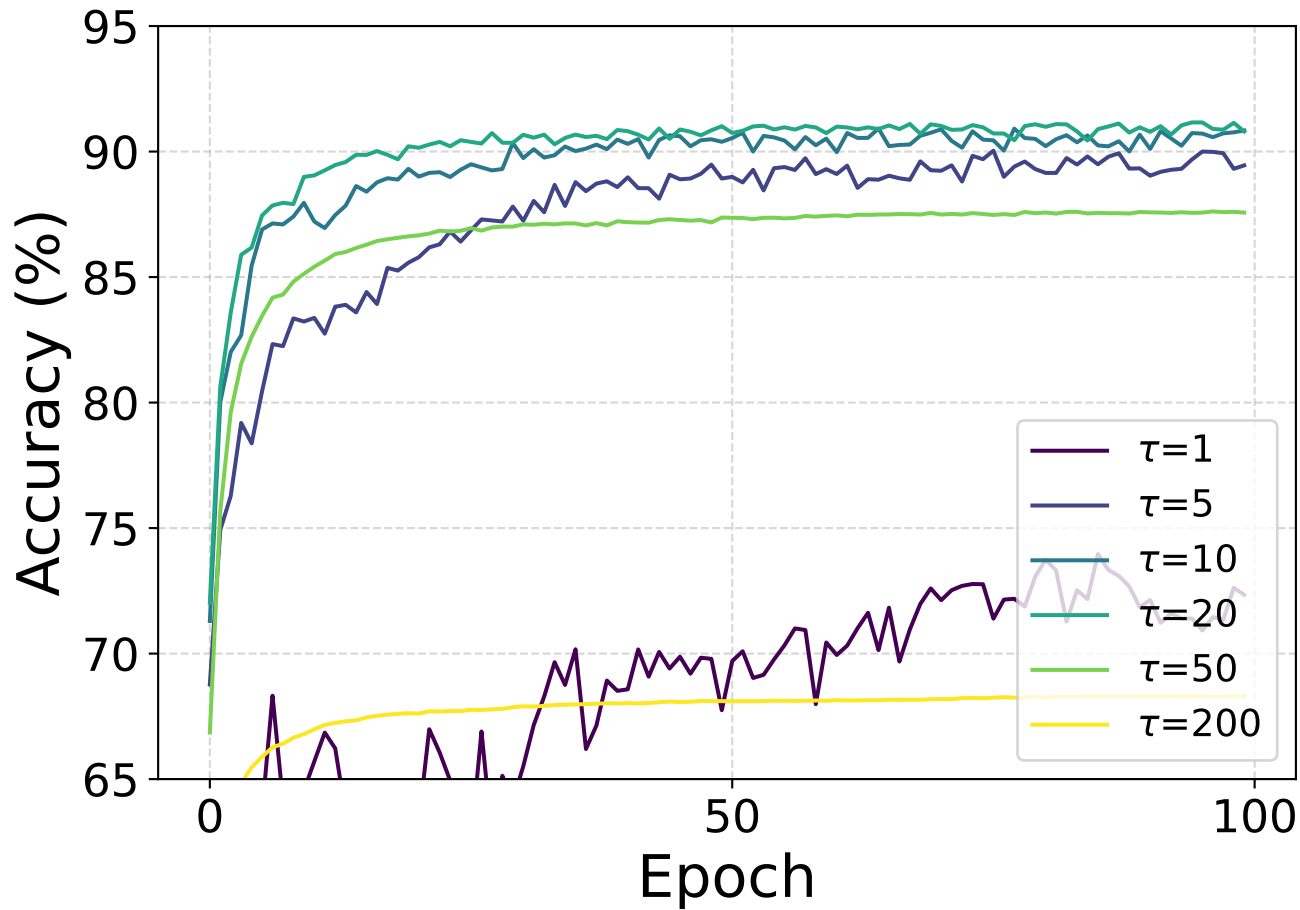

Supplement: supplementary_material [file emnist_letters_different_tau.pdf › dlgn_scalability/analysis/plots/emnist_letters_different_tau.pdf]

Accuracy (%)

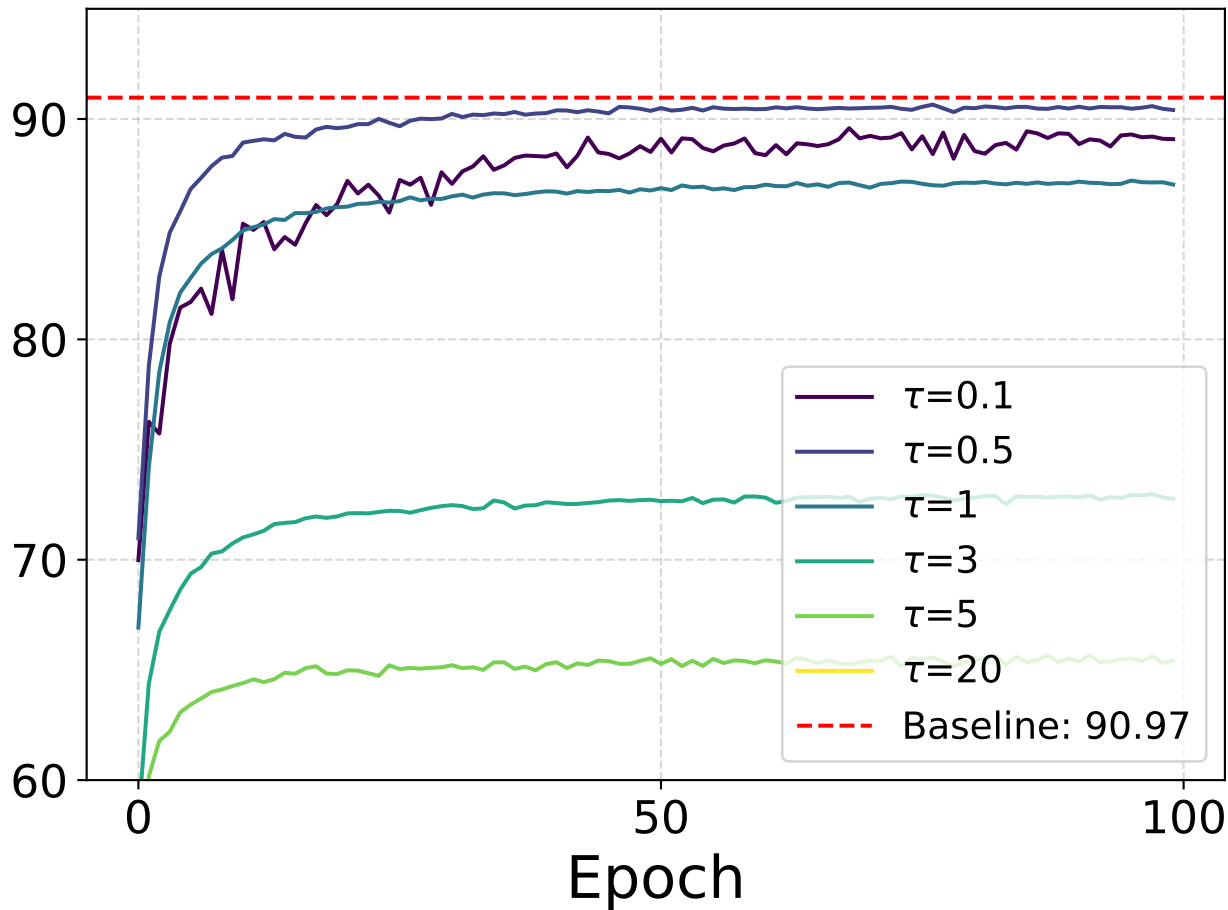

Supplement: supplementary_material [file emnist_letters_distance.pdf › dlgn_scalability/analysis/plots/emnist_letters_distance.pdf]

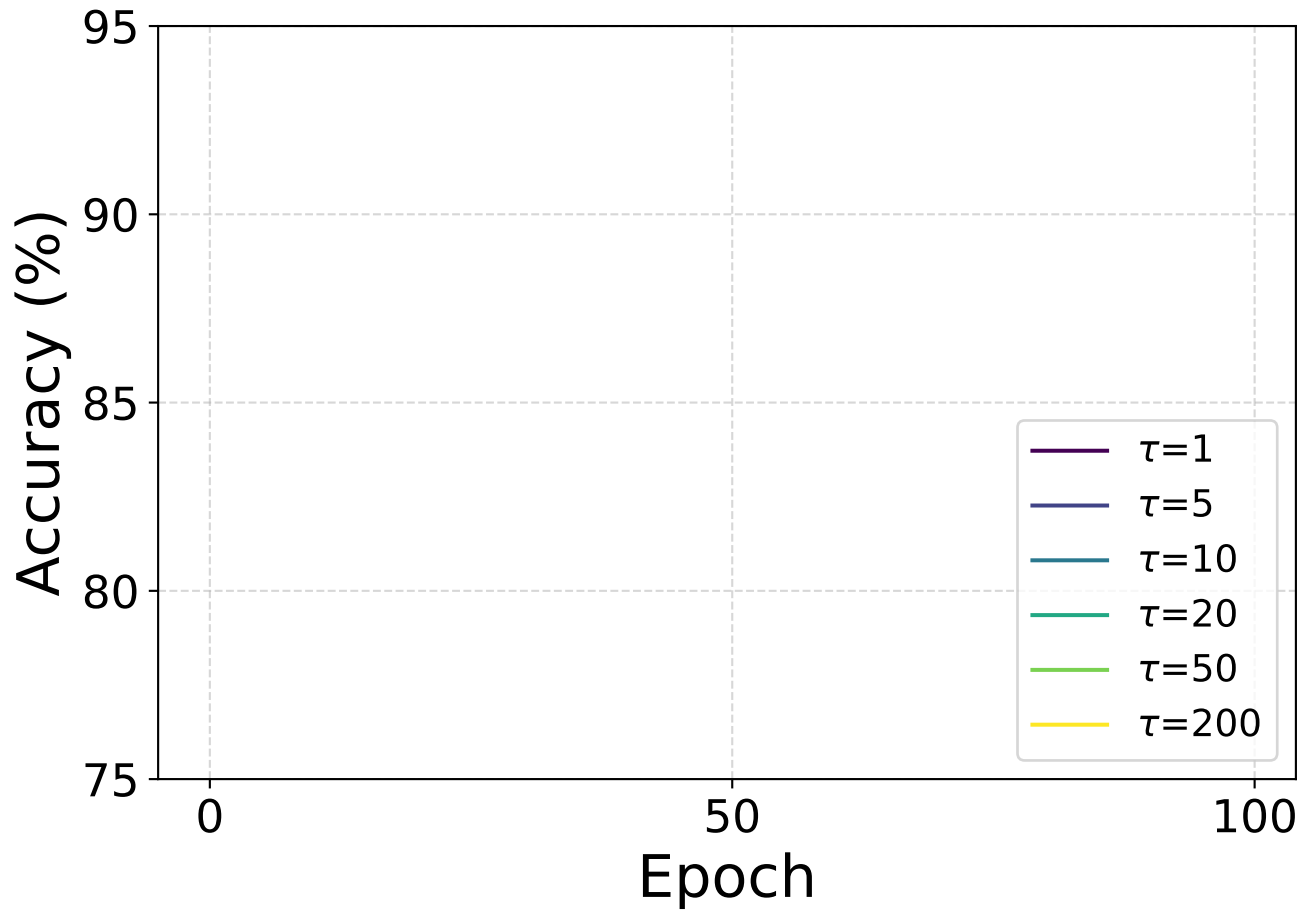

Supplement: supplementary_material [file fmnist_different_tau.pdf › dlgn_scalability/analysis/plots/fmnist_different_tau.pdf]

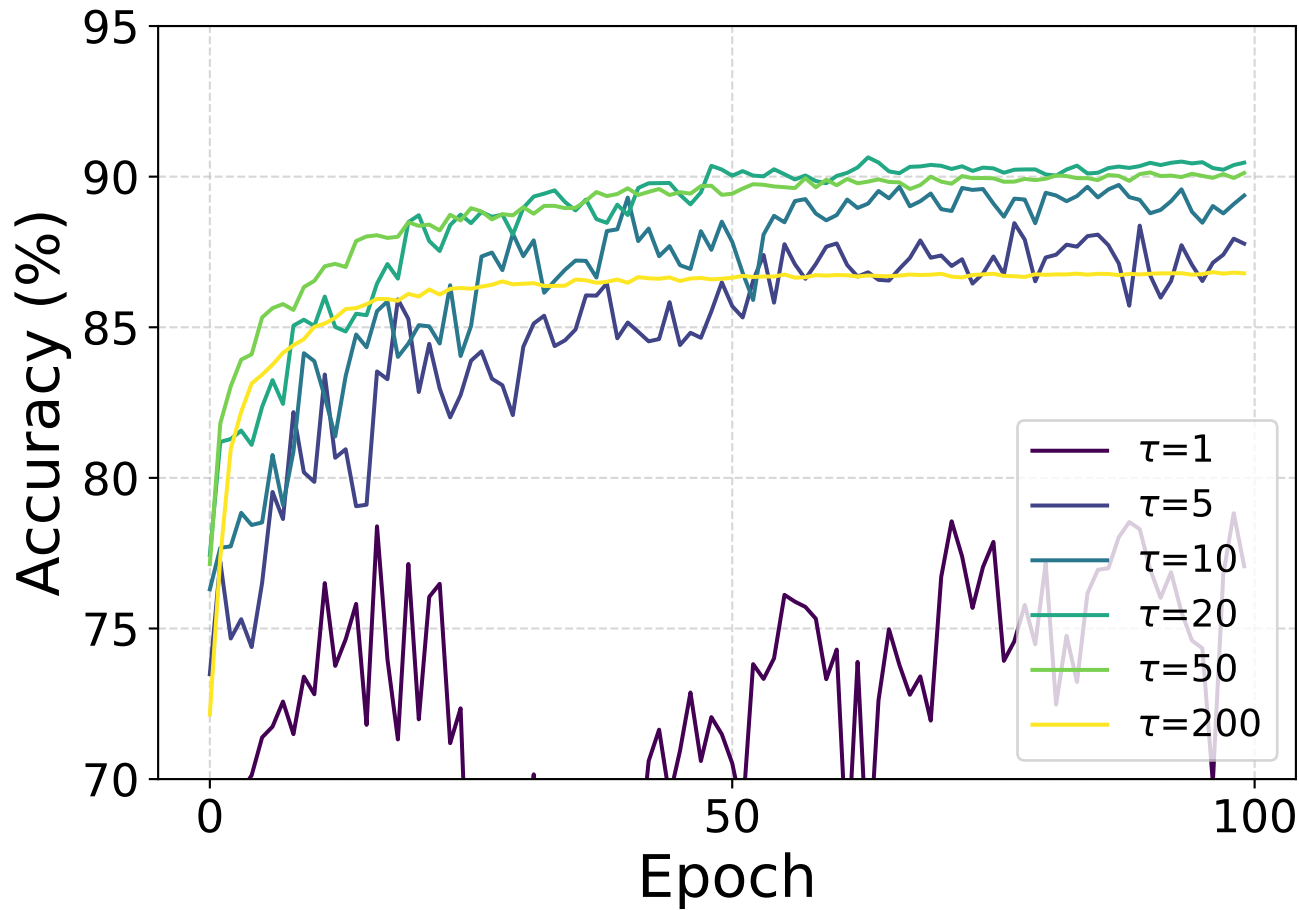

Supplement: supplementary_material [file fmnist_different_tau_2.pdf › dlgn_scalability/analysis/plots/fmnist_different_tau_2.pdf]

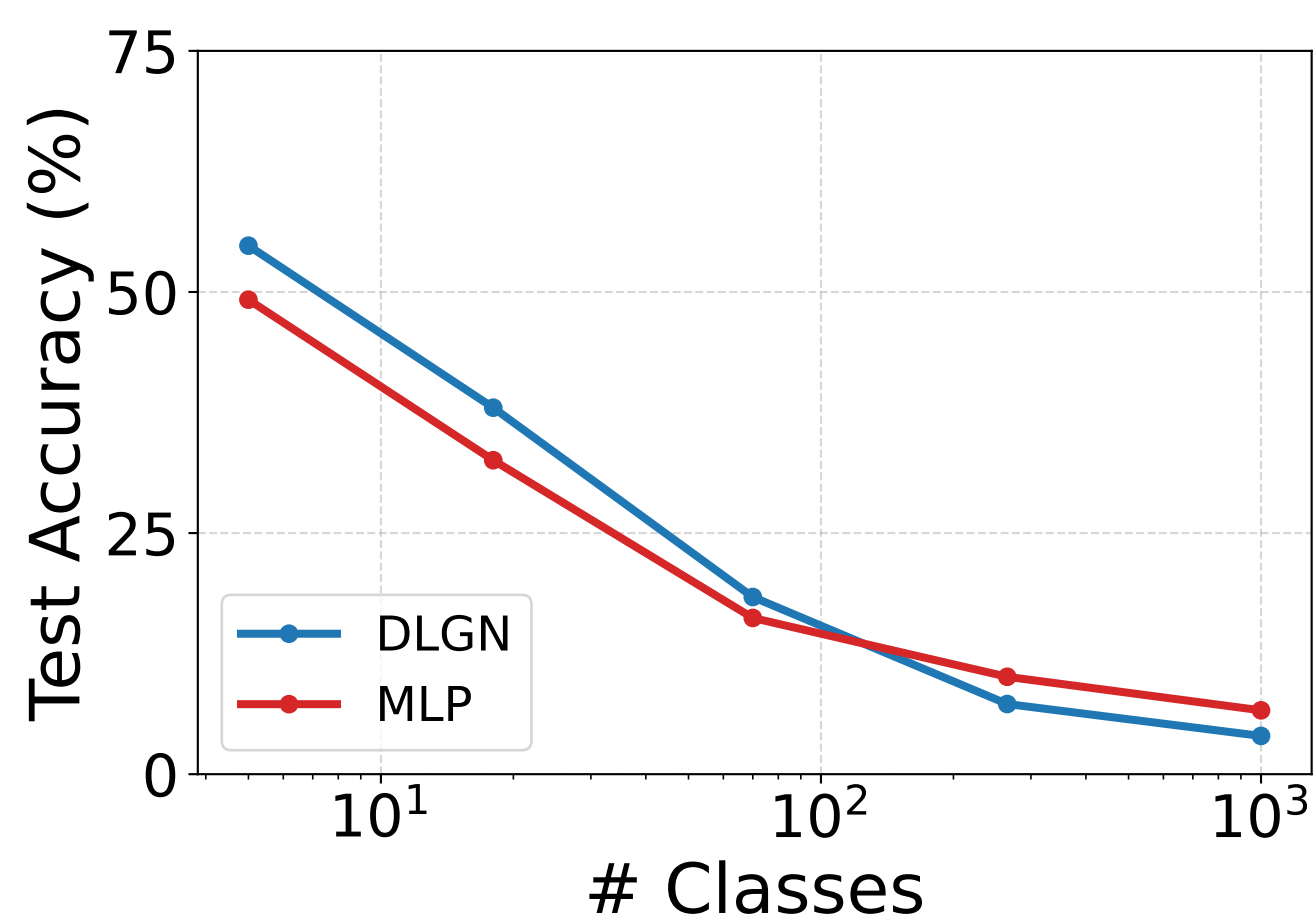

Supplement: supplementary_material [file imagenet_num_classes_best.pdf › dlgn_scalability/analysis/plots/imagenet_num_classes_best.pdf]

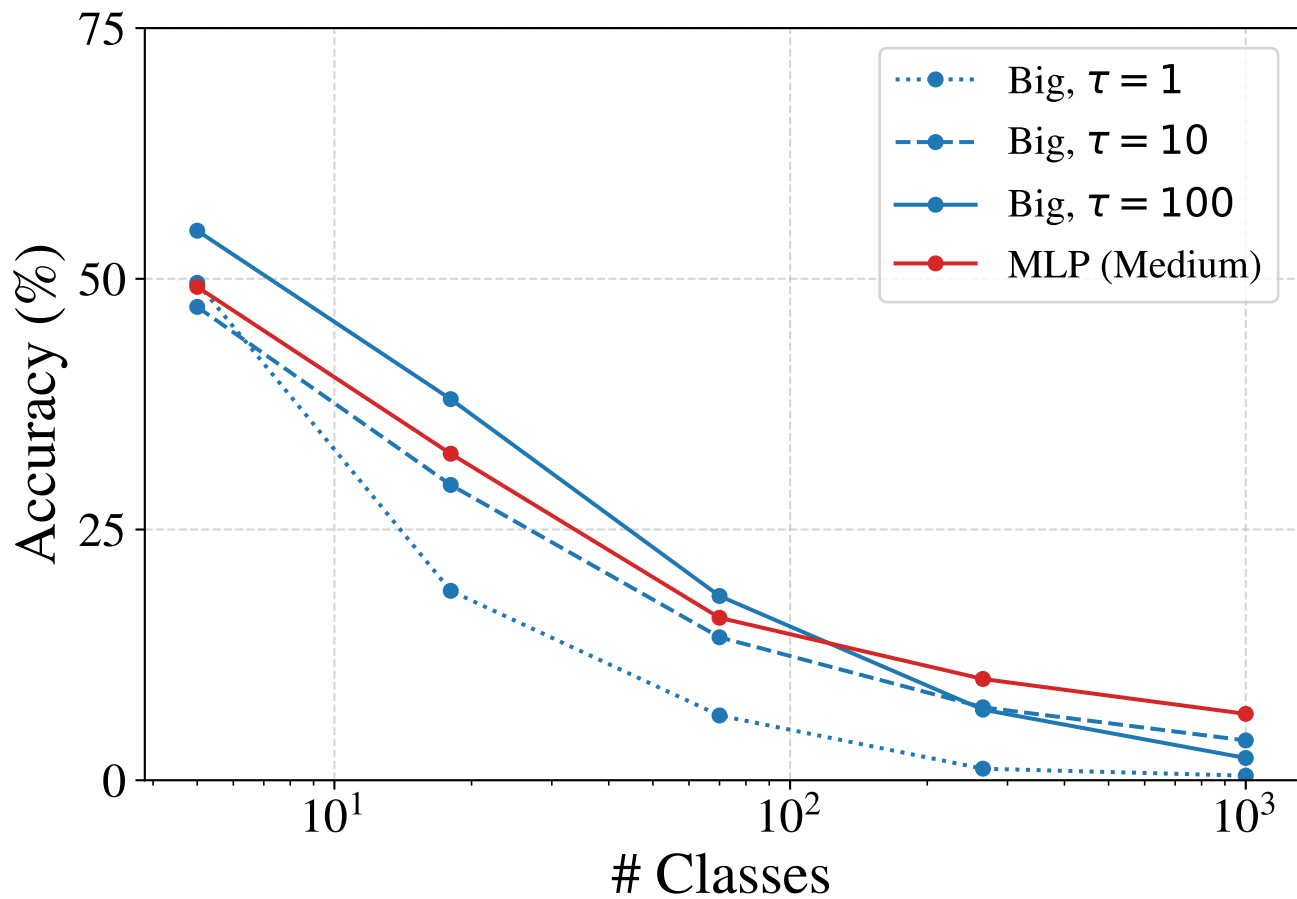

Supplement: supplementary_material [file imagenet_num_classes_presentation.pdf › dlgn_scalability/analysis/plots/imagenet_num_classes_presentation.pdf]

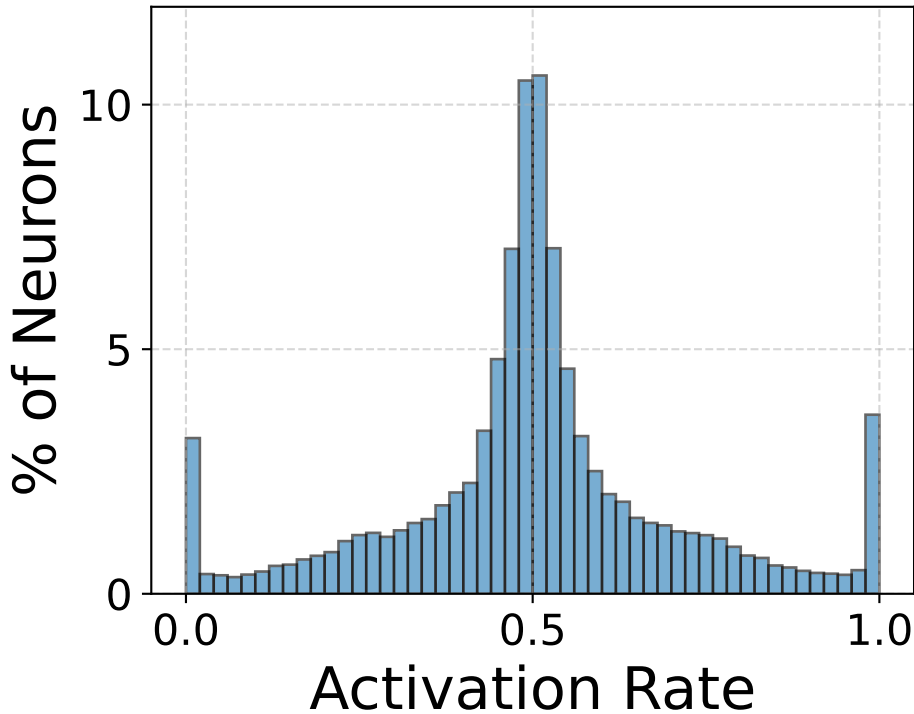

Supplement: supplementary_material [file mnist_activation_rate_1.pdf › dlgn_scalability/analysis/plots/mnist_activation_rate_1.pdf]

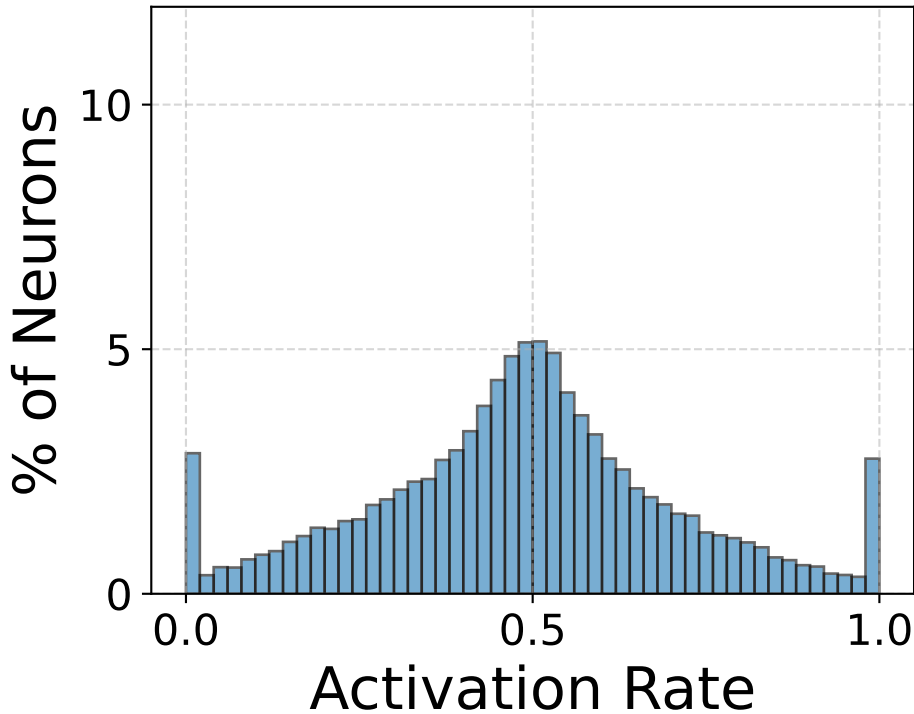

Supplement: supplementary_material [file mnist_activation_rate_50.pdf › dlgn_scalability/analysis/plots/mnist_activation_rate_50.pdf]

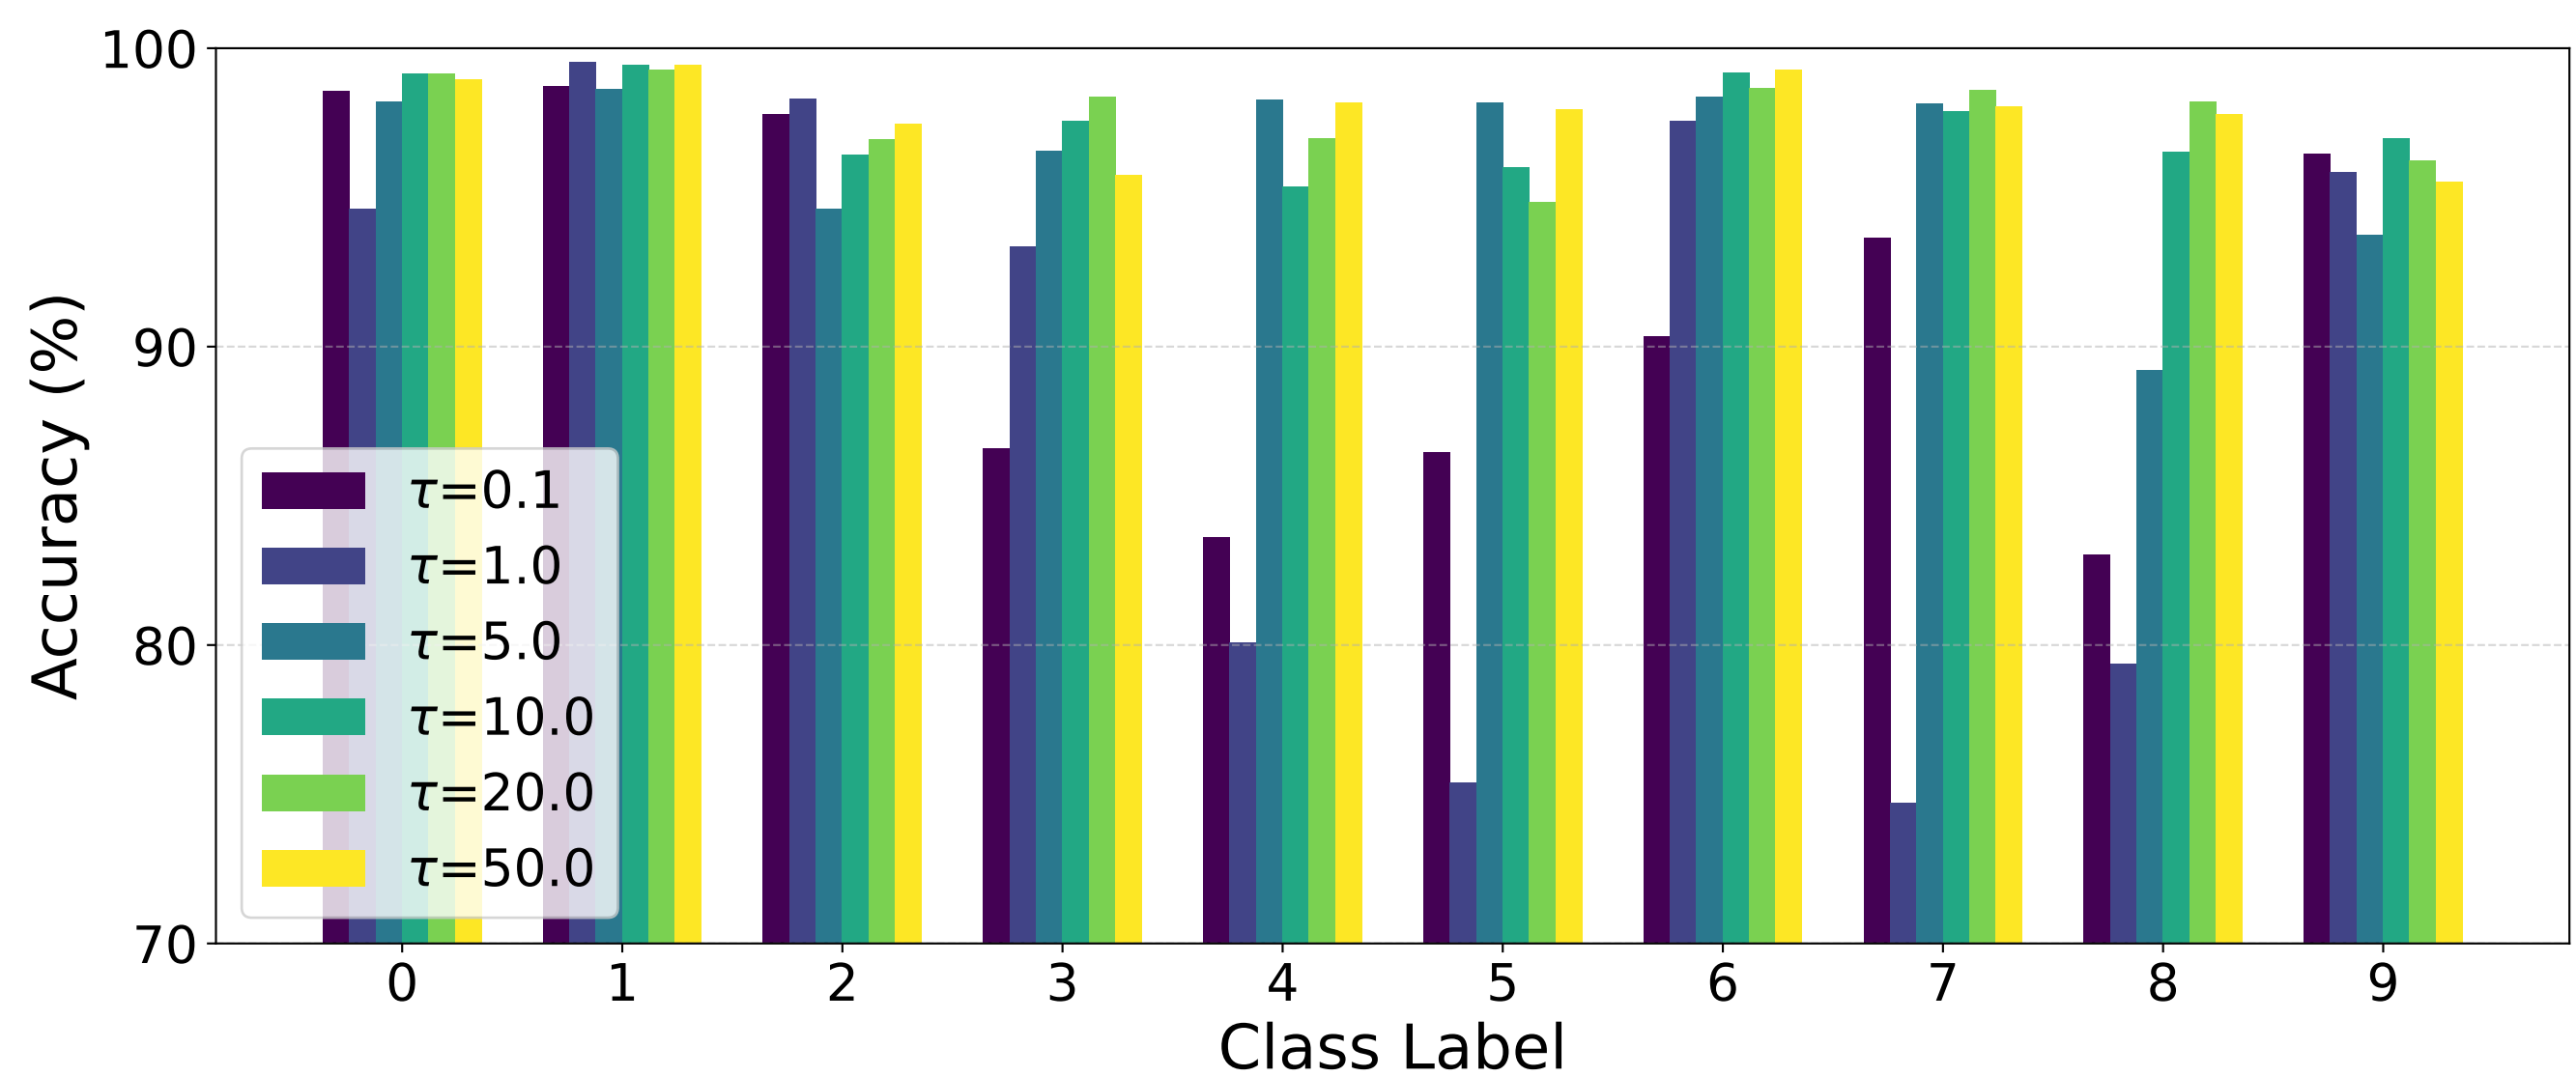

Supplement: supplementary_material [file mnist_class_specific_acc.pdf › dlgn_scalability/analysis/plots/mnist_class_specific_acc.pdf]

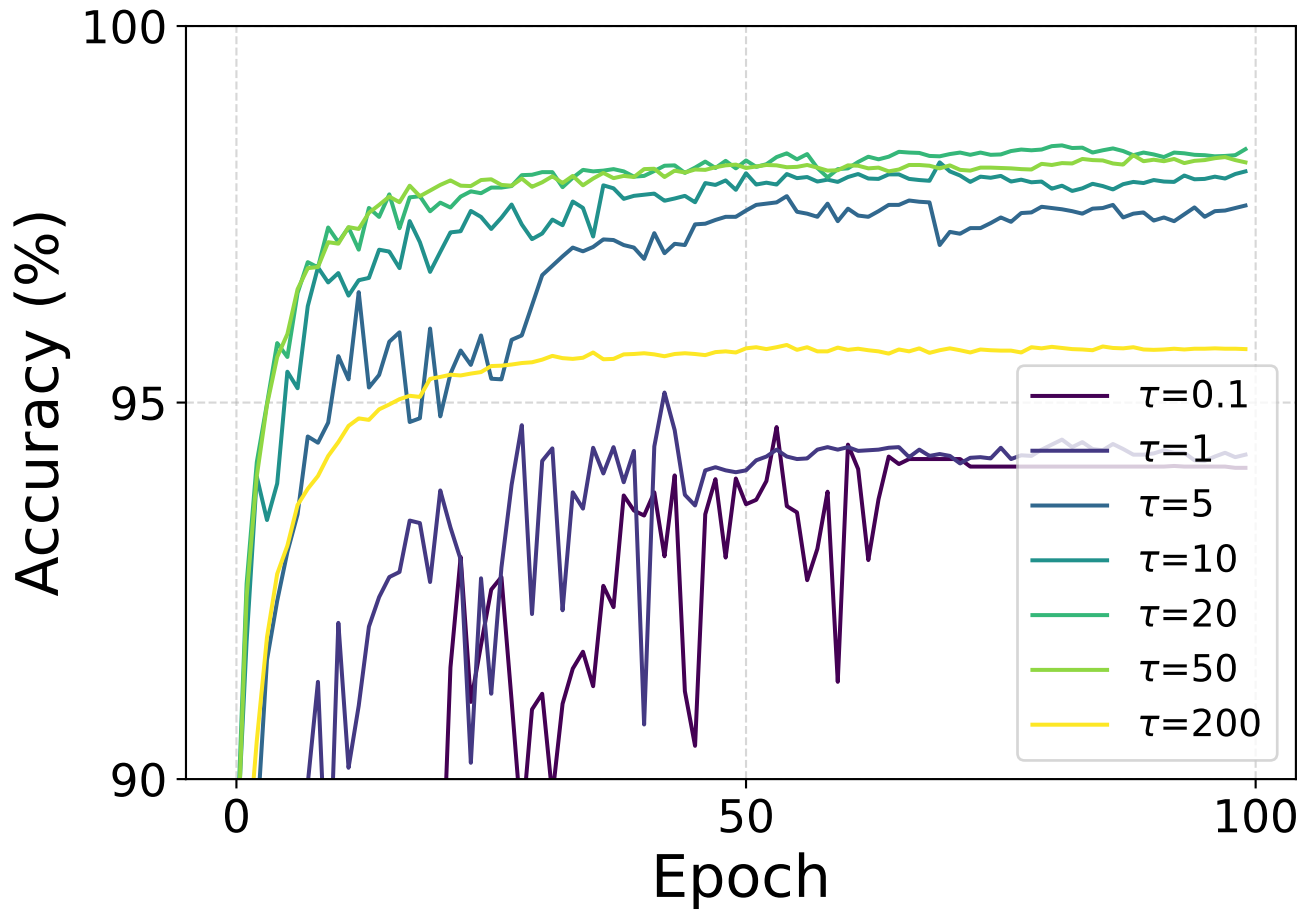

Supplement: supplementary_material [file mnist_different_tau.pdf › dlgn_scalability/analysis/plots/mnist_different_tau.pdf]

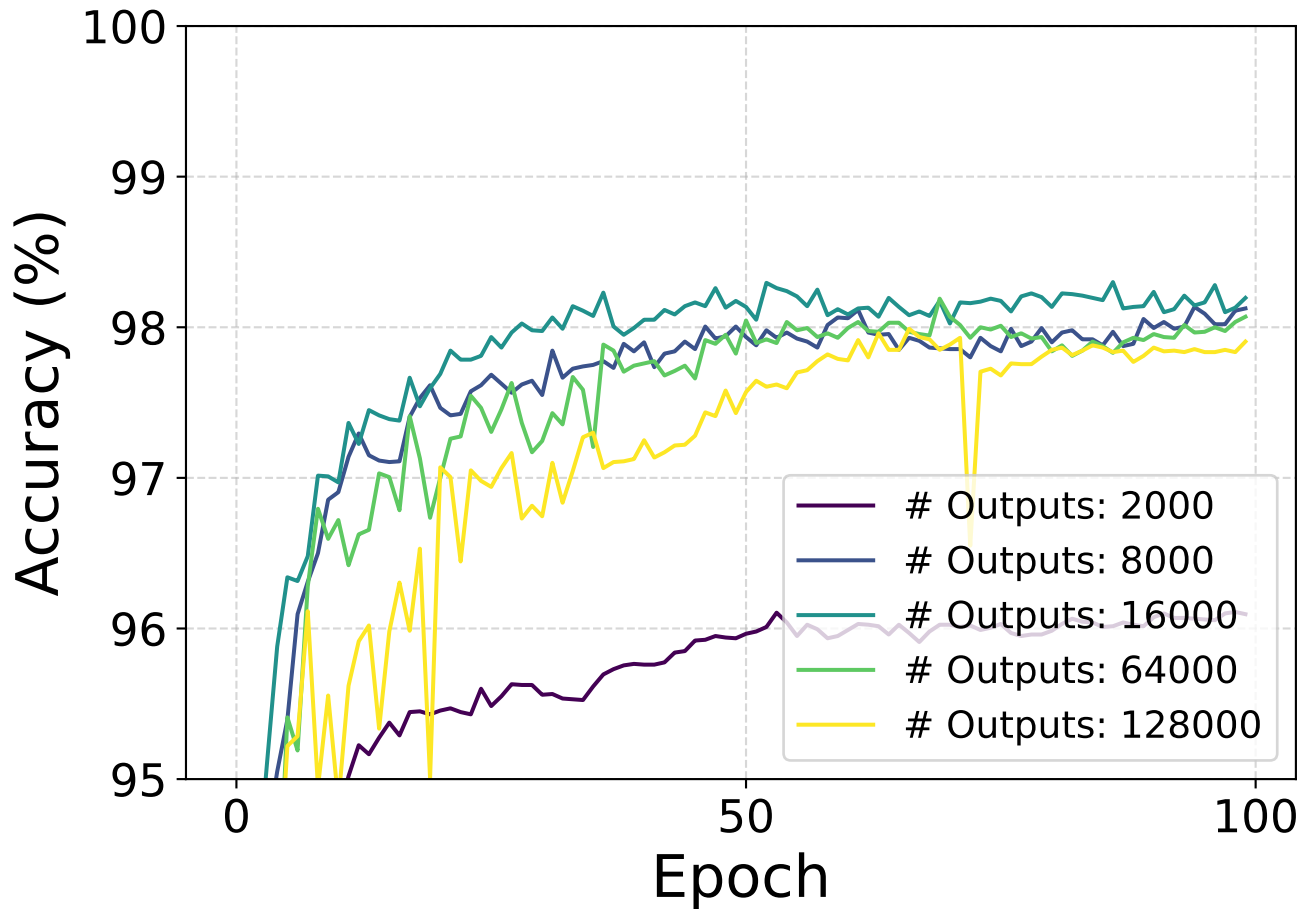

Supplement: supplementary_material [file mnist_num_last_layer_neurons.pdf › dlgn_scalability/analysis/plots/mnist_num_last_layer_neurons.pdf]

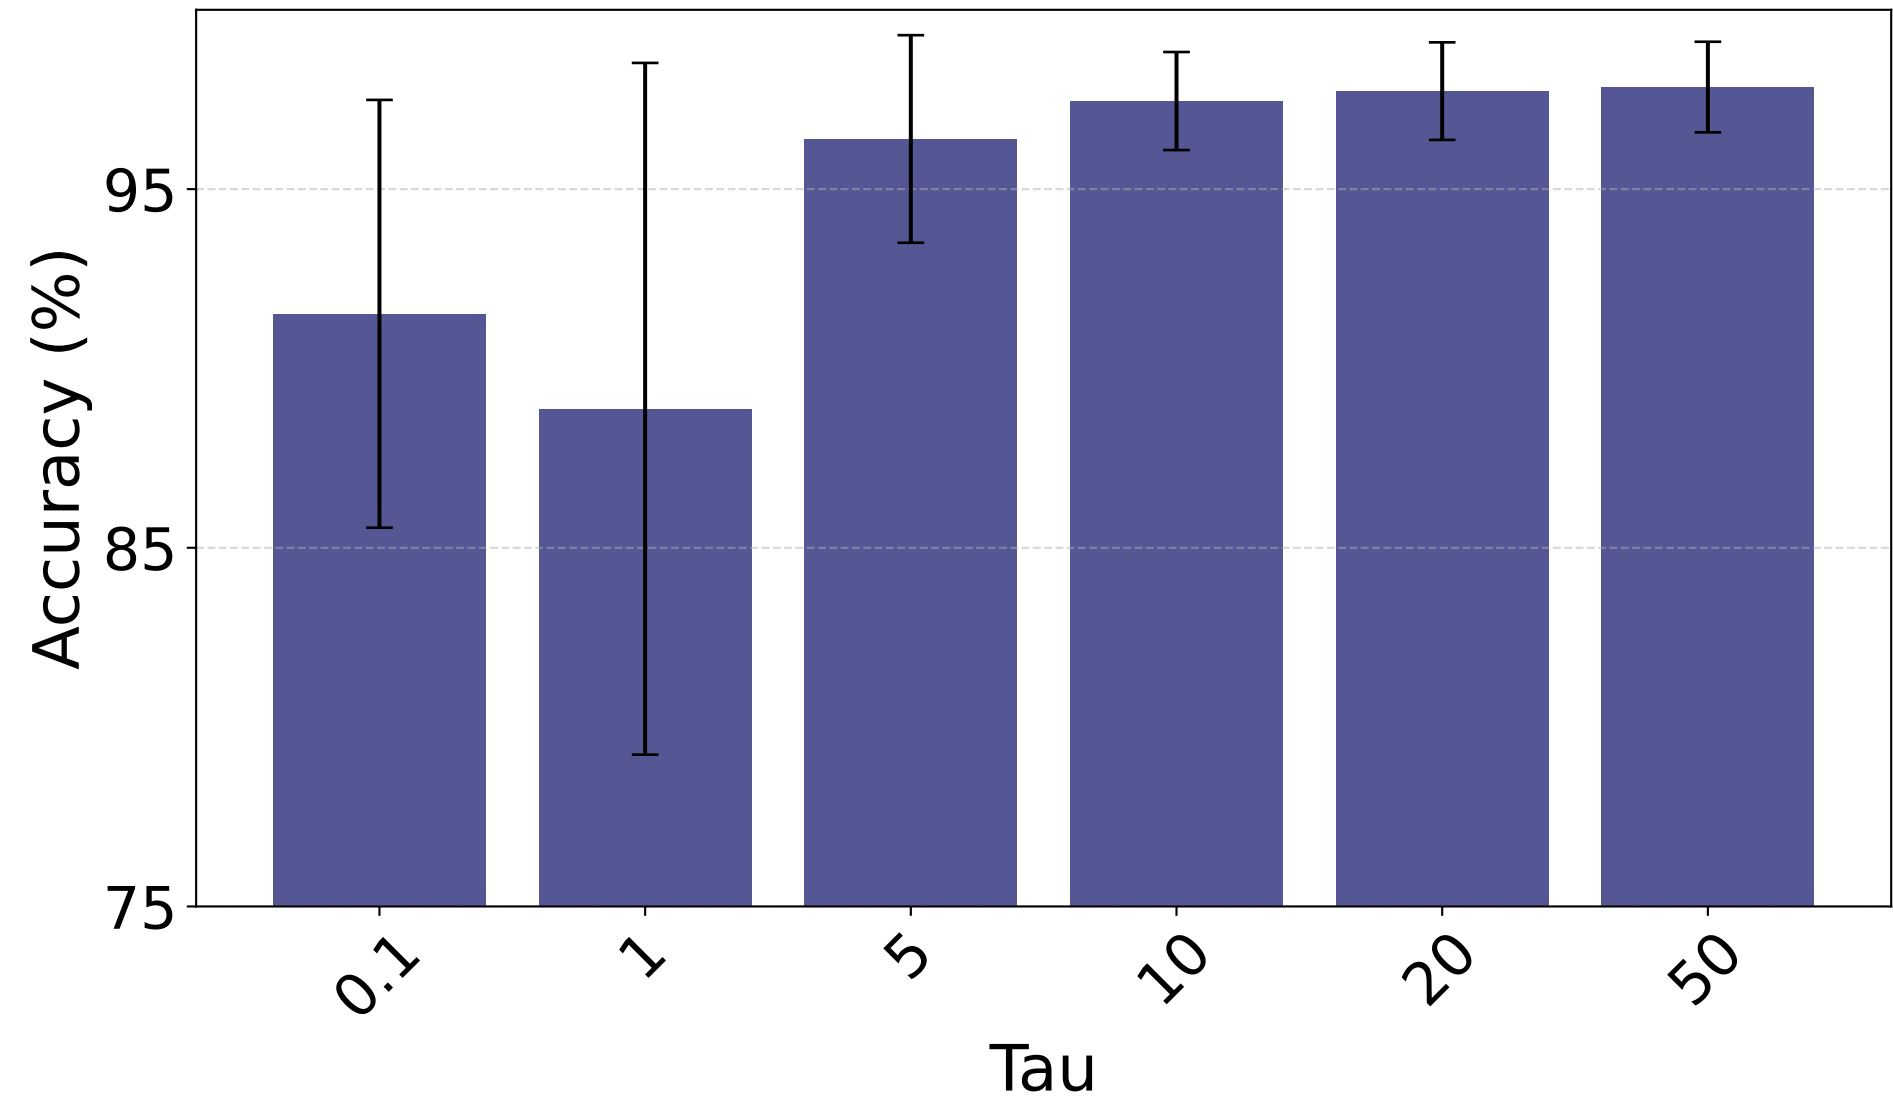

Supplement: supplementary_material [file mnist_per_class_accuracy.pdf › dlgn_scalability/analysis/plots/mnist_per_class_accuracy.pdf]

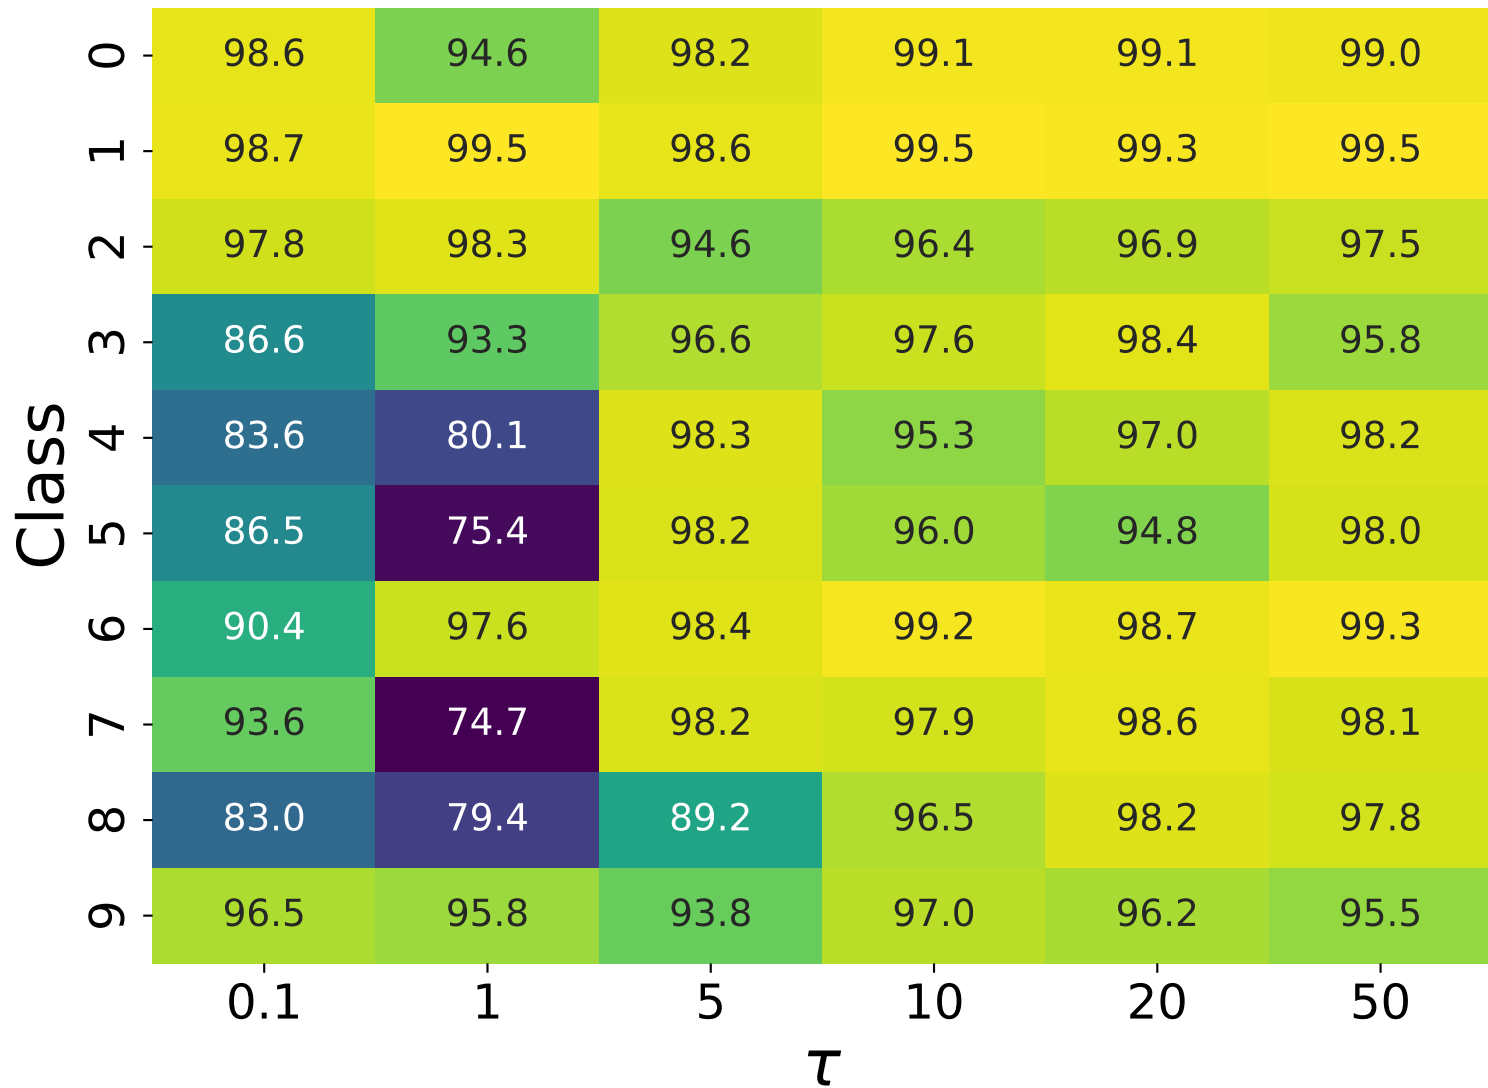

Supplement: supplementary_material [file mnist_per_class_accuracy_heatmap.pdf › dlgn_scalability/analysis/plots/mnist_per_class_accuracy_heatmap.pdf]

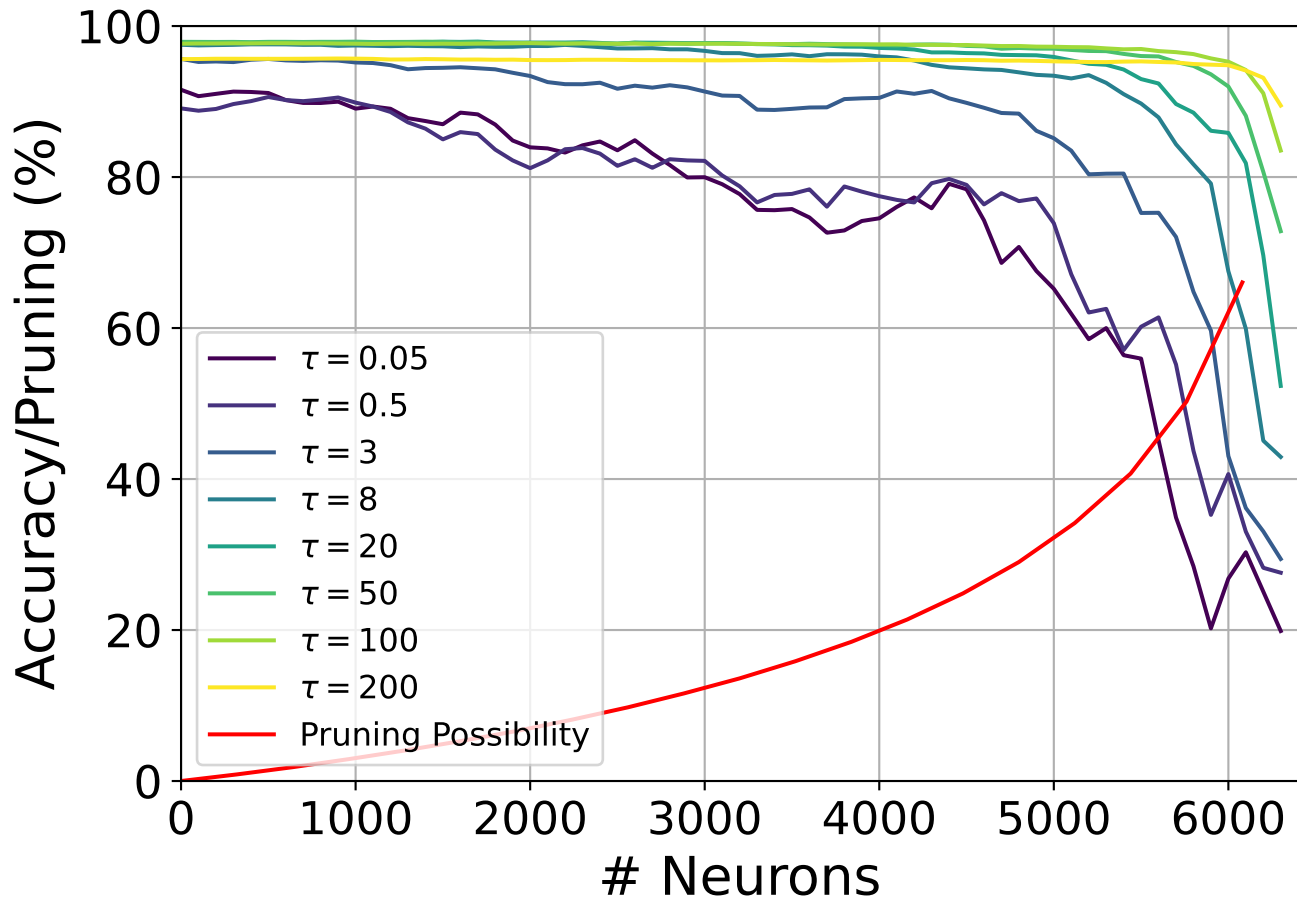

Supplement: supplementary_material [file mnist_pruning_tau.pdf › dlgn_scalability/analysis/plots/mnist_pruning_tau.pdf]

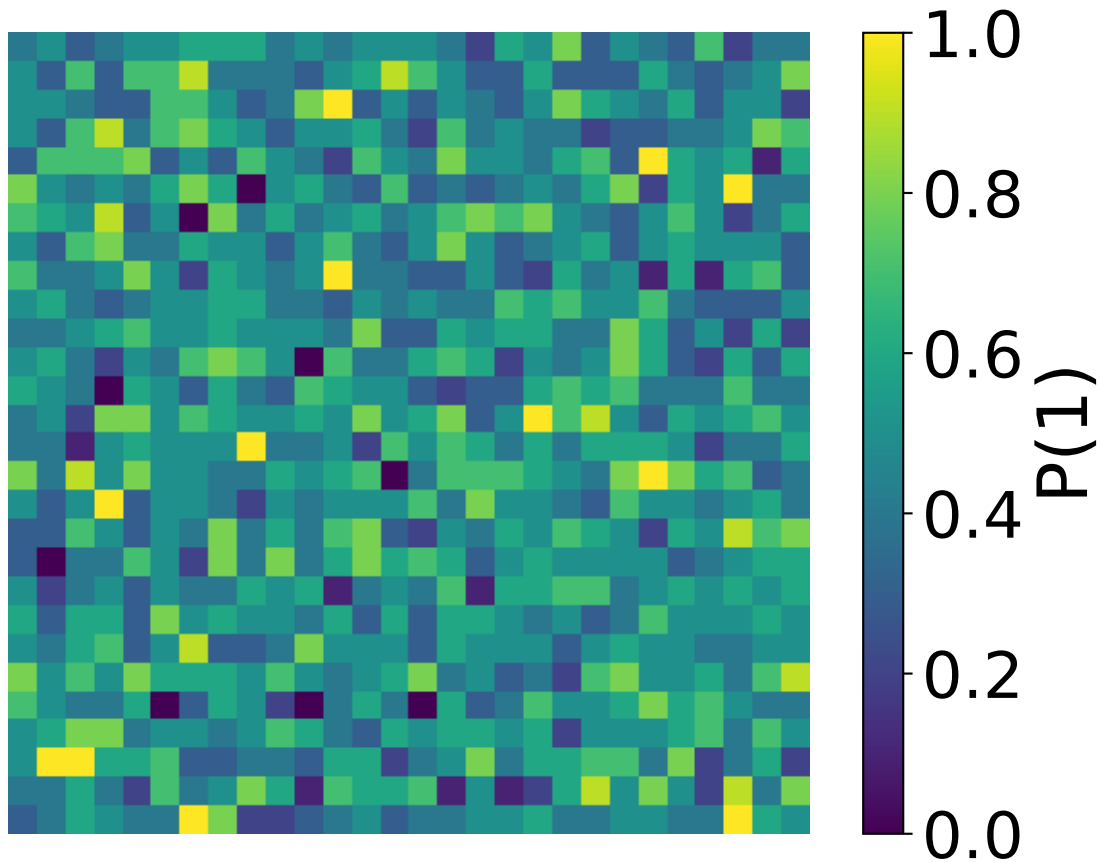

Supplement: supplementary_material [file synthetic_frequency.pdf › dlgn_scalability/analysis/plots/synthetic_frequency.pdf]

Accuracy (%)

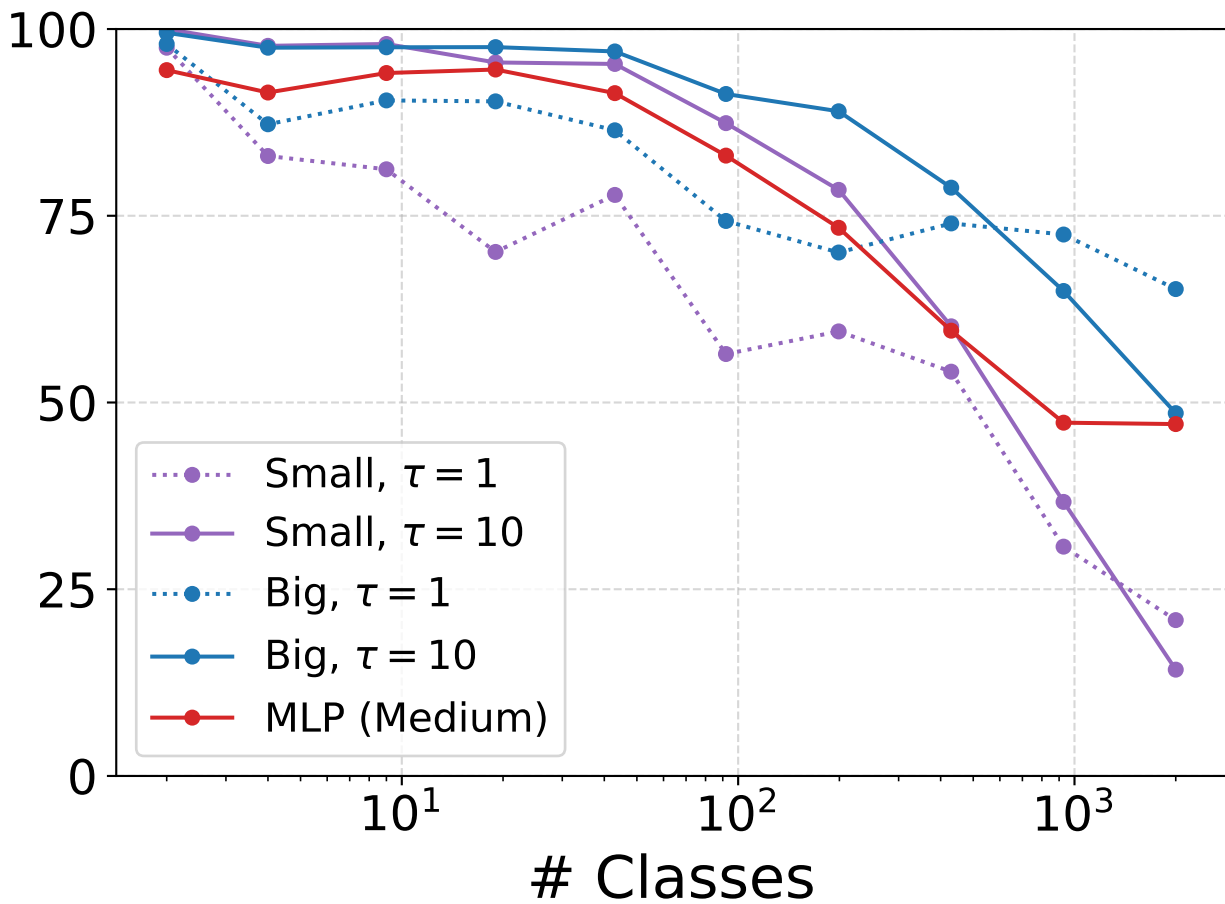

Supplement: supplementary_material [file synthetic_num_classes.pdf › dlgn_scalability/analysis/plots/synthetic_num_classes.pdf]

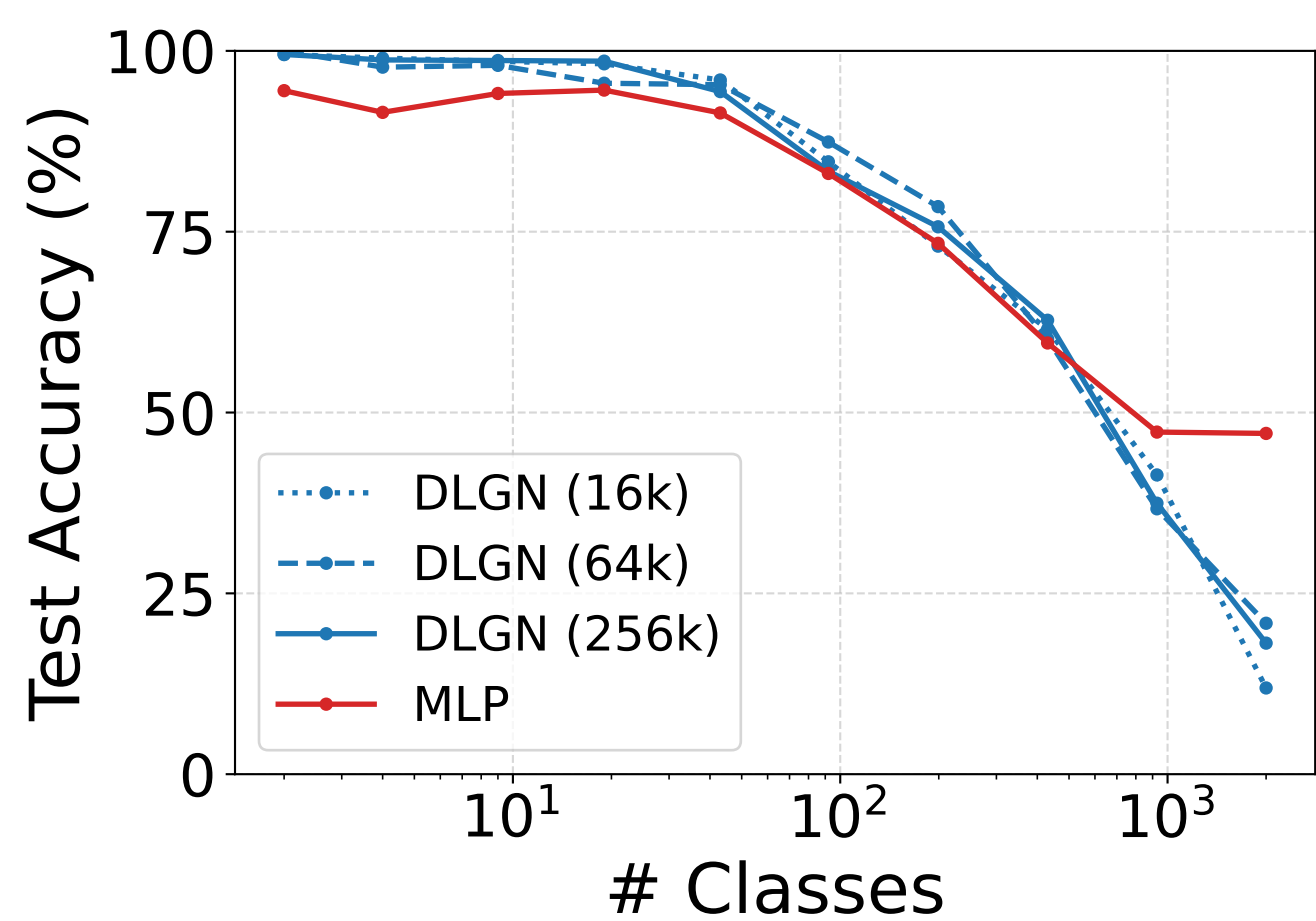

Supplement: supplementary_material [file synthetic_num_classes_best.pdf › dlgn_scalability/analysis/plots/synthetic_num_classes_best.pdf]

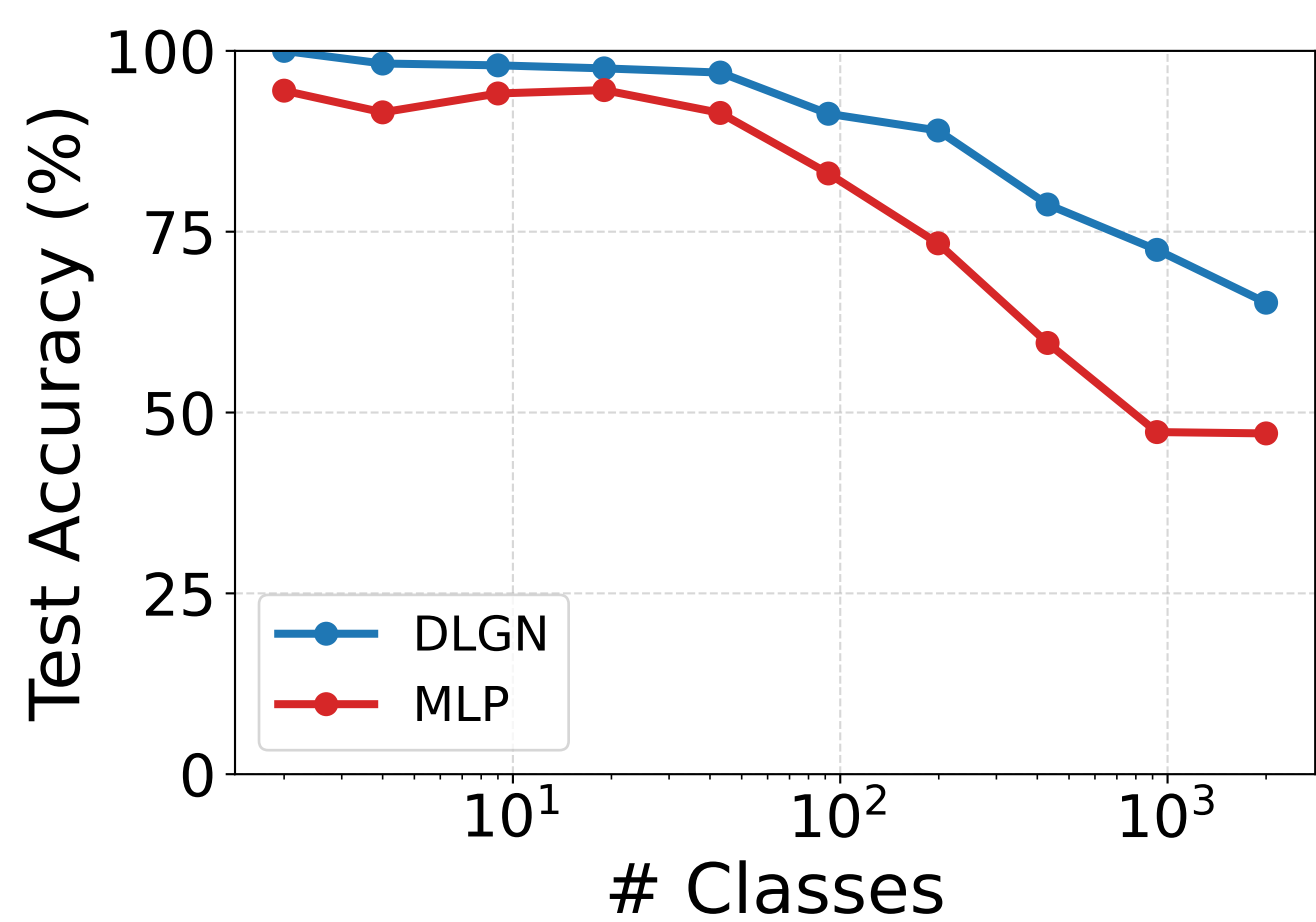

Supplement: supplementary_material [file synthetic_num_classes_intro.pdf › dlgn_scalability/analysis/plots/synthetic_num_classes_intro.pdf]

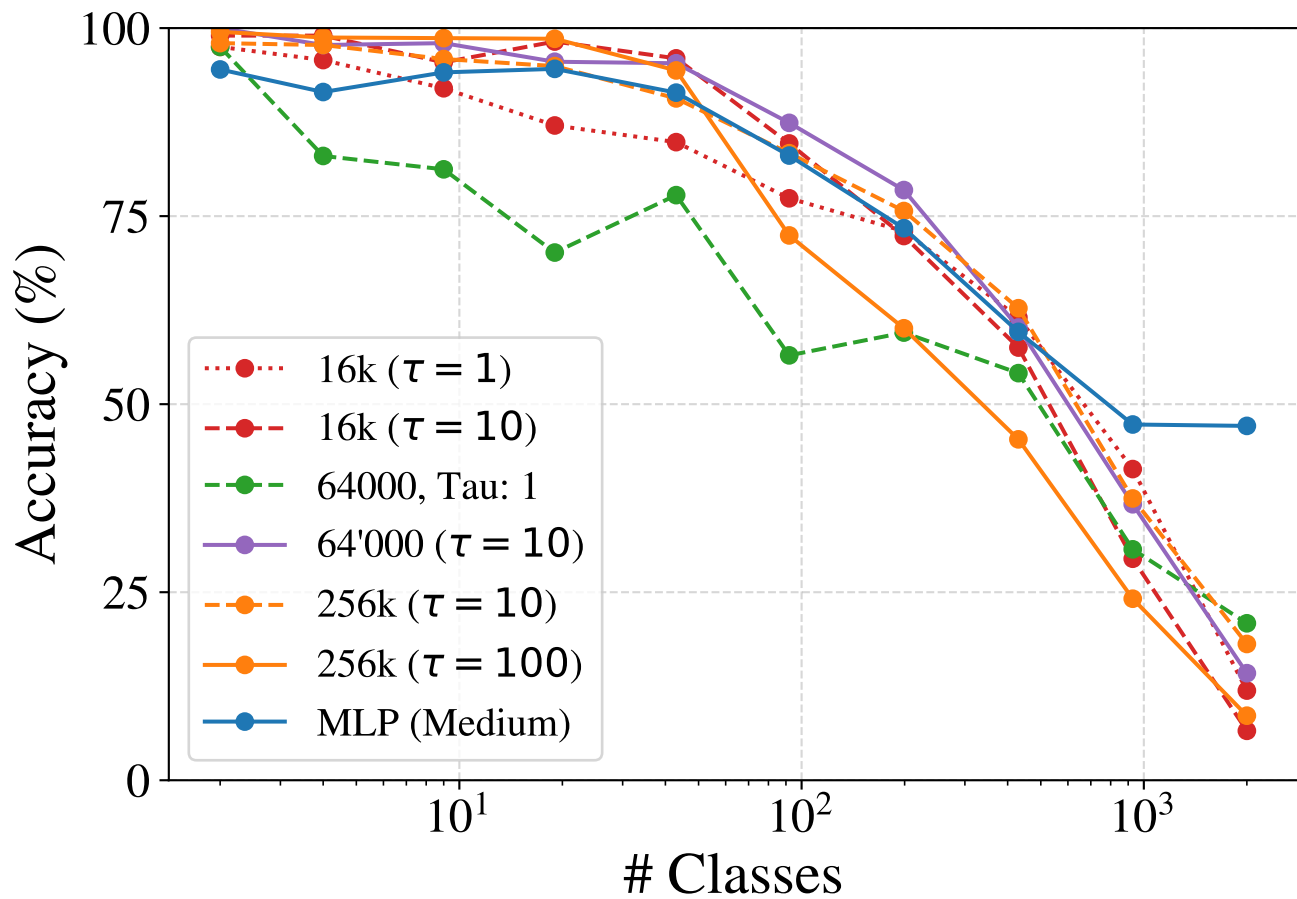

Supplement: supplementary_material [file synthetic_num_classes_output_dimension.pdf › dlgn_scalability/analysis/plots/synthetic_num_classes_output_dimension.pdf]

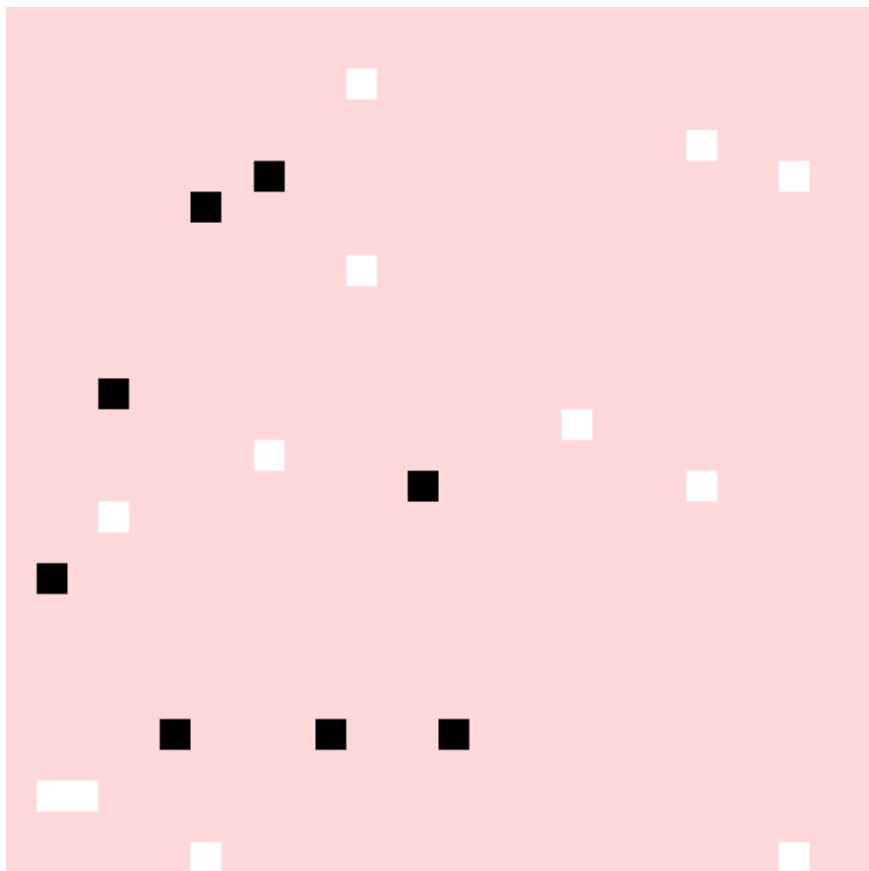

Supplement: supplementary_material [file synthetic_pattern.pdf › dlgn_scalability/analysis/plots/synthetic_pattern.pdf]

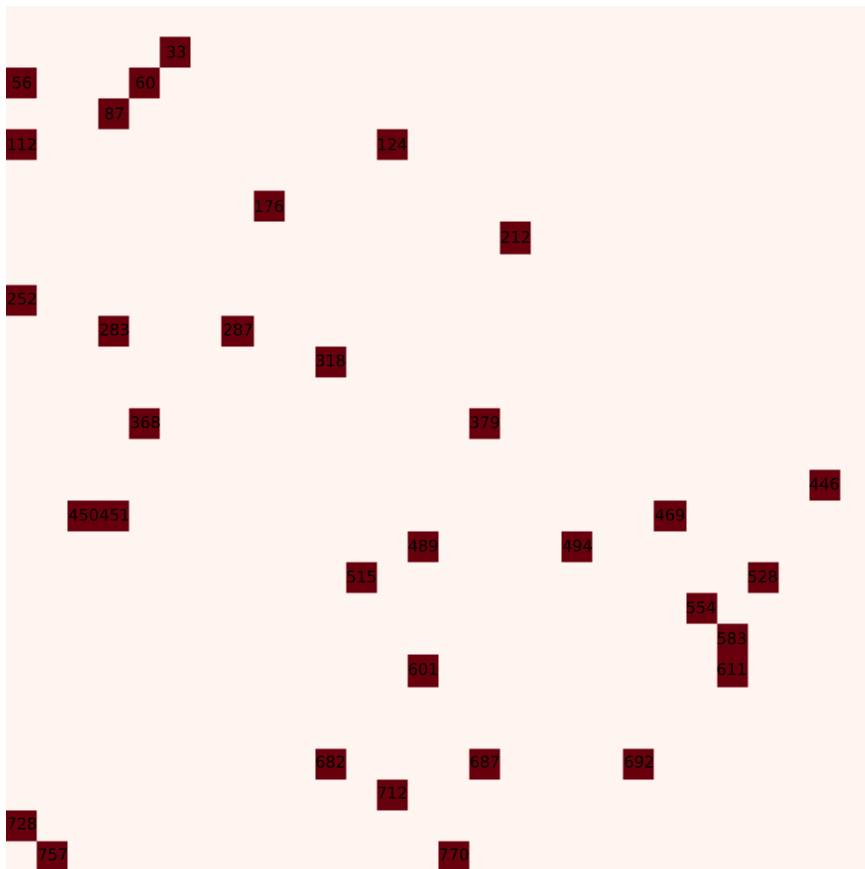

Supplement: supplementary_material [file synthetic_pattern_annotated.pdf › dlgn_scalability/analysis/plots/synthetic_pattern_annotated.pdf]

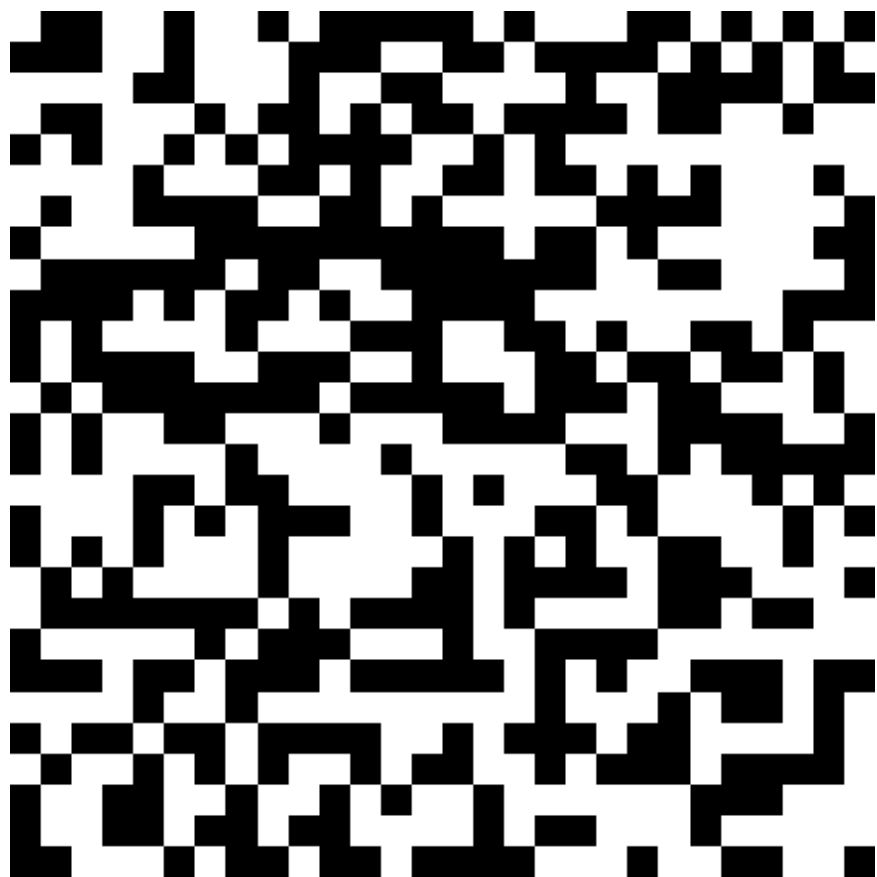

Supplement: supplementary_material [file synthetic_sample.pdf › dlgn_scalability/analysis/plots/synthetic_sample.pdf]

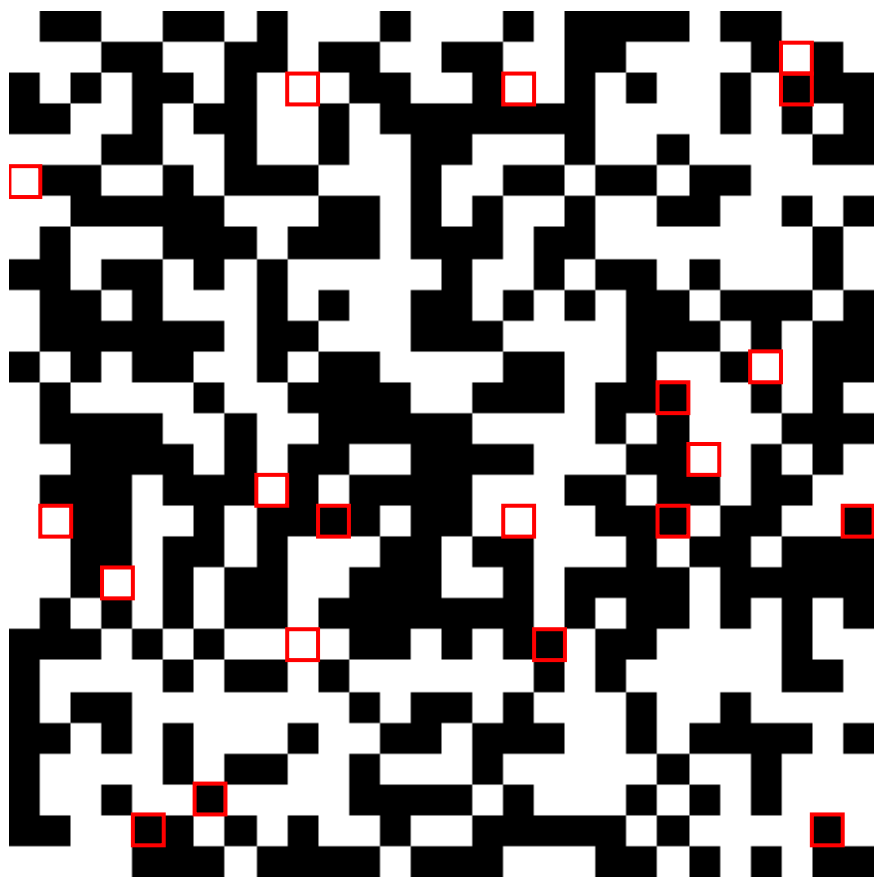

Supplement: supplementary_material [file synthetic_sample_0.pdf › dlgn_scalability/analysis/plots/synthetic_sample_0.pdf]

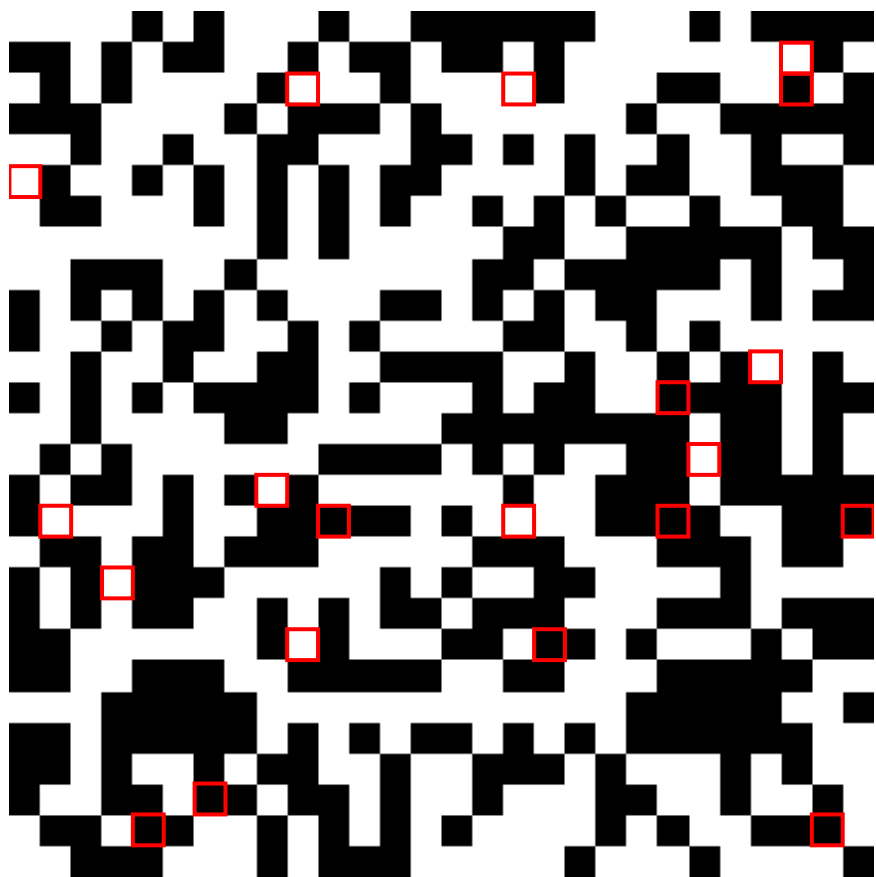

Supplement: supplementary_material [file synthetic_sample_1.pdf › dlgn_scalability/analysis/plots/synthetic_sample_1.pdf]

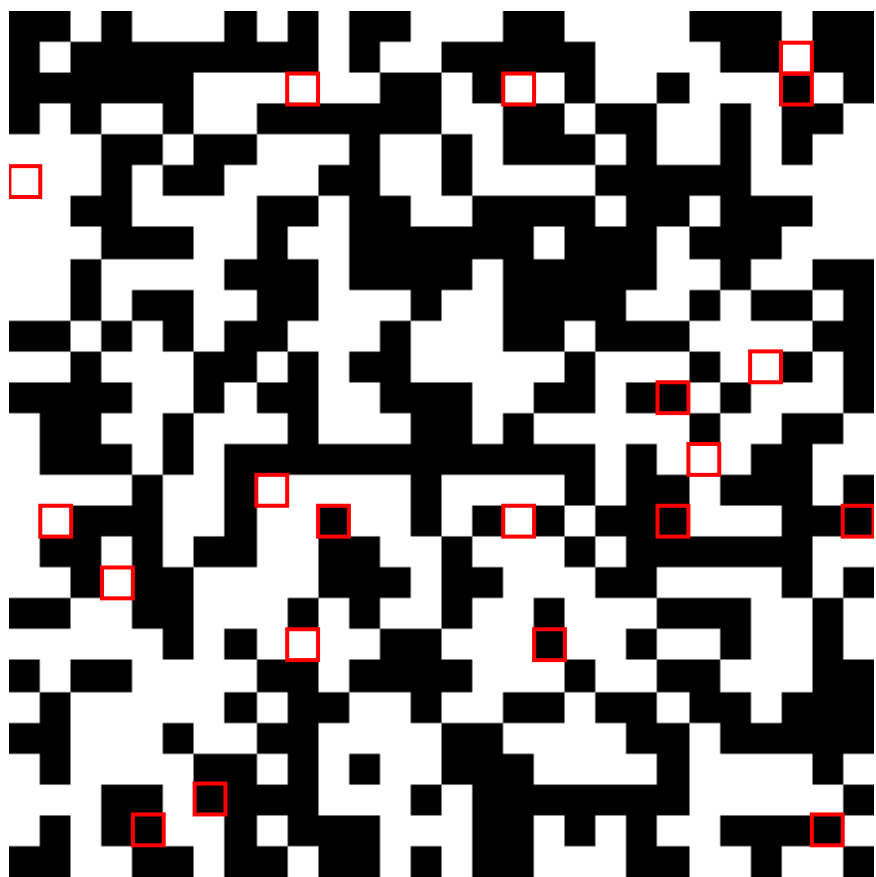

Supplement: supplementary_material [file synthetic_sample_2.pdf › dlgn_scalability/analysis/plots/synthetic_sample_2.pdf]
